# Supplementary material for: Disruption of the grid cell network in a mouse model of early Alzheimer’s disease
Source: PubMed Central journal article supplement (PMC8850598; doi:10.1038/s41467-022-28551-x), 2022-02-16
Supplement: 41467_2022_28551_MOESM1_ESM.pdf [file 41467_2022_28551_MOESM1_ESM.pdf]

Supplementary Information for

**Disruption of the grid cell network in a mouse model of early Alzheimer's disease**

Johnson Ying, Alexandra T. Keinath, Raphael Lavoie, Erika Vigneault, Salah El Mestikawy, Mark P. Brandon

\*Correspondence to: [mark.brandon@mcgill.ca](mailto:mark.brandon@mcgill.ca)

Contains:

- **Supplementary Tables 1-2**
- **Supplementary Figures 1-24**

**Supplementary Table 1. Summary of MEC cell yield within subject.**

| <b>Animal ID#</b> | <b>Genotype</b> | <b>Sex</b> | <b>Age Group</b> | <b># recording sessions</b> | <b># total cells</b> | <b># total cells MEC</b> | <b># grid cells</b> | <b># HD cells</b> | <b># Non-grid spatial cells</b> |
|-------------------|-----------------|------------|------------------|-----------------------------|----------------------|--------------------------|---------------------|-------------------|---------------------------------|
| 12015             | nTG             | F          | A                | 5                           | 21                   | 18                       | 0                   | 7                 | 0                               |
| 12040             | APP             | M          | A                | 11                          | 35                   | 35                       | 1                   | 5                 | 1                               |
| 12375             | nTG             | F          | Y                | 21                          | 114                  | 114                      | 1                   | 35                | 14                              |
| 12378             | nTG             | F          | Y                | 9                           | 28                   | 28                       | 1                   | 12                | 0                               |
| 12644             | nTG             | F          | A                | 7                           | 32                   | 0                        | 0                   | 0                 | 0                               |
| 12646             | APP             | F          | A                | 2                           | 3                    | 3                        | 1                   | 3                 | 0                               |
| 12655             | nTG             | F          | A                | 5                           | 15                   | 4                        | 0                   | 2                 | 0                               |
| 12656             | nTG             | F          | A                | 8                           | 36                   | 0                        | 0                   | 0                 | 0                               |
| 12746             | nTG             | F          | A                | 10                          | 36                   | 36                       | 2                   | 20                | 3                               |
| 12748             | nTG             | F          | A                | 33                          | 97                   | 97                       | 16                  | 25                | 7                               |
| 12756             | nTG             | F          | A                | 10                          | 36                   | 8                        | 0                   | 3                 | 4                               |
| 12757             | nTG             | F          | A                | 18                          | 64                   | 55                       | 0                   | 20                | 4                               |
| 12758             | APP             | F          | A                | 24                          | 112                  | 40                       | 1                   | 17                | 0                               |
| 12759             | APP             | F          | A                | 23                          | 70                   | 70                       | 0                   | 30                | 3                               |
| 12784             | APP             | M          | A                | 18                          | 81                   | 81                       | 1                   | 26                | 7                               |
| 12785             | APP             | M          | A                | 22                          | 32                   | 32                       | 2                   | 11                | 2                               |
| 12786             | nTG             | M          | A                | 18                          | 60                   | 60                       | 1                   | 9                 | 7                               |
| 12787             | nTG             | M          | A                | 24                          | 153                  | 91                       | 1                   | 13                | 9                               |
| 12788             | APP             | M          | A                | 7                           | 9                    | 7                        | 0                   | 4                 | 0                               |
| 12790             | APP             | M          | A                | 18                          | 79                   | 79                       | 2                   | 27                | 2                               |
| 12791             | nTG             | M          | A                | 38                          | 192                  | 192                      | 1                   | 49                | 17                              |
| 12792             | APP             | M          | A                | 14                          | 31                   | 31                       | 1                   | 11                | 1                               |
| 12794             | nTG             | M          | A                | 14                          | 29                   | 29                       | 0                   | 7                 | 1                               |
| 13530             | APP             | F          | Y                | 10                          | 29                   | 5                        | 0                   | 3                 | 0                               |
| 13532             | APP             | F          | Y                | 28                          | 117                  | 117                      | 4                   | 38                | 10                              |
| 13534             | APP             | F          | Y                | 30                          | 142                  | 142                      | 27                  | 21                | 31                              |
| 13601             | nTG             | F          | Y                | 18                          | 67                   | 7                        | 0                   | 0                 | 0                               |
| 13630             | nTG             | M          | Y, A             | 33                          | 260                  | 260                      | 79                  | 45                | 29                              |
| 13631             | nTG             | M          | Y                | 16                          | 95                   | 95                       | 0                   | 38                | 6                               |
| 13683             | APP             | F          | A                | 12                          | 64                   | 64                       | 1                   | 17                | 3                               |
| 13781             | nTG             | M          | A                | 16                          | 46                   | 16                       | 5                   | 4                 | 2                               |
| 13782             | nTG             | M          | A                | 26                          | 168                  | 168                      | 31                  | 54                | 20                              |
| 13783             | nTG             | M          | A                | 23                          | 104                  | 104                      | 7                   | 20                | 6                               |

|       |     |   |      |    |     |     |    |     |    |
|-------|-----|---|------|----|-----|-----|----|-----|----|
| 13784 | nTG | M | A    | 14 | 65  | 11  | 1  | 2   | 1  |
| 13791 | APP | F | A    | 14 | 43  | 43  | 0  | 5   | 0  |
| 13792 | APP | F | A    | 13 | 40  | 40  | 0  | 5   | 2  |
| 13794 | APP | F | Y    | 17 | 63  | 63  | 0  | 24  | 7  |
| 13795 | APP | M | Y    | 21 | 91  | 64  | 0  | 15  | 3  |
| 13798 | nTG | M | Y    | 19 | 106 | 106 | 7  | 16  | 10 |
| 13799 | APP | M | Y    | 25 | 86  | 86  | 31 | 13  | 3  |
| 13827 | nTG | M | Y    | 17 | 84  | 84  | 0  | 36  | 4  |
| 13828 | APP | M | A    | 19 | 52  | 52  | 8  | 17  | 0  |
| 13884 | nTG | F | Y, A | 22 | 57  | 29  | 1  | 12  | 2  |
| 13885 | nTG | F | Y, A | 25 | 87  | 87  | 6  | 23  | 7  |
| 13894 | APP | F | A    | 17 | 86  | 86  | 2  | 12  | 14 |
| 13895 | nTG | F | Y    | 18 | 63  | 63  | 1  | 17  | 0  |
| 13927 | APP | F | A    | 23 | 97  | 97  | 0  | 44  | 2  |
| 13928 | nTG | F | Y    | 10 | 20  | 20  | 0  | 10  | 0  |
| 13931 | APP | F | A    | 16 | 53  | 53  | 1  | 12  | 10 |
| 14012 | APP | F | A    | 13 | 40  | 40  | 0  | 18  | 0  |
| 14014 | APP | M | A    | 15 | 62  | 62  | 1  | 12  | 1  |
| 14015 | APP | M | A    | 15 | 80  | 80  | 0  | 30  | 4  |
| 14020 | APP | F | A    | 12 | 47  | 47  | 0  | 20  | 3  |
| 14117 | APP | F | A    | 12 | 29  | 29  | 0  | 9   | 2  |
| 14118 | APP | F | A    | 12 | 34  | 34  | 6  | 3   | 4  |
| 14125 | APP | M | A    | 15 | 59  | 59  | 12 | 10  | 1  |
| 14574 | APP | F | Y, A | 22 | 71  | 71  | 0  | 10  | 11 |
| 14593 | APP | F | A    | 20 | 63  | 63  | 6  | 21  | 7  |
| 14598 | APP | M | A    | 14 | 57  | 36  | 0  | 20  | 0  |
| 14599 | APP | M | A    | 25 | 68  | 68  | 2  | 9   | 8  |
| 14623 | APP | M | A    | 25 | 94  | 63  | 1  | 9   | 28 |
| 14754 | APP | M | Y, A | 30 | 175 | 139 | 1  | 31  | 0  |
| 14756 | APP | M | Y, A | 30 | 267 | 267 | 3  | 127 | 26 |
| 14757 | APP | M | Y, A | 34 | 168 | 164 | 8  | 43  | 7  |
| 14847 | nTG | F | Y, A | 21 | 63  | 63  | 0  | 25  | 1  |
| 14849 | nTG | M | Y, A | 20 | 95  | 52  | 1  | 16  | 1  |
| 15035 | APP | F | Y, A | 30 | 188 | 188 | 2  | 45  | 22 |
| 15036 | nTG | F | Y    | 25 | 108 | 64  | 1  | 19  | 10 |

**Supplementary Table 2. Summary of CA1 cell yield within subject.**

| <b>Animal ID#</b> | <b>Genotype</b> | <b>Sex</b> | <b># recording sessions</b> | <b># total cells</b> | <b># place cells</b> |
|-------------------|-----------------|------------|-----------------------------|----------------------|----------------------|
| 16129             | APP             | F          | 17                          | 58                   | 28                   |
| 16130             | nTG             | F          | 15                          | 74                   | 58                   |
| 16132             | nTG             | M          | 14                          | 60                   | 27                   |
| 16133             | APP             | M          | 14                          | 102                  | 76                   |
| 16135             | nTG             | M          | 24                          | 137                  | 79                   |
| 16153             | nTG             | F          | 2                           | 9                    | 4                    |
| 16154             | APP             | F          | 17                          | 138                  | 45                   |
| 17624             | APP             | F          | 22                          | 53                   | 18                   |
| 17625             | nTG             | F          | 18                          | 87                   | 37                   |
| 17627             | APP             | F          | 19                          | 115                  | 51                   |
| 17628             | nTG             | F          | 18                          | 74                   | 49                   |
| 17903             | APP             | M          | 8                           | 85                   | 33                   |

## Supplementary Figure 1

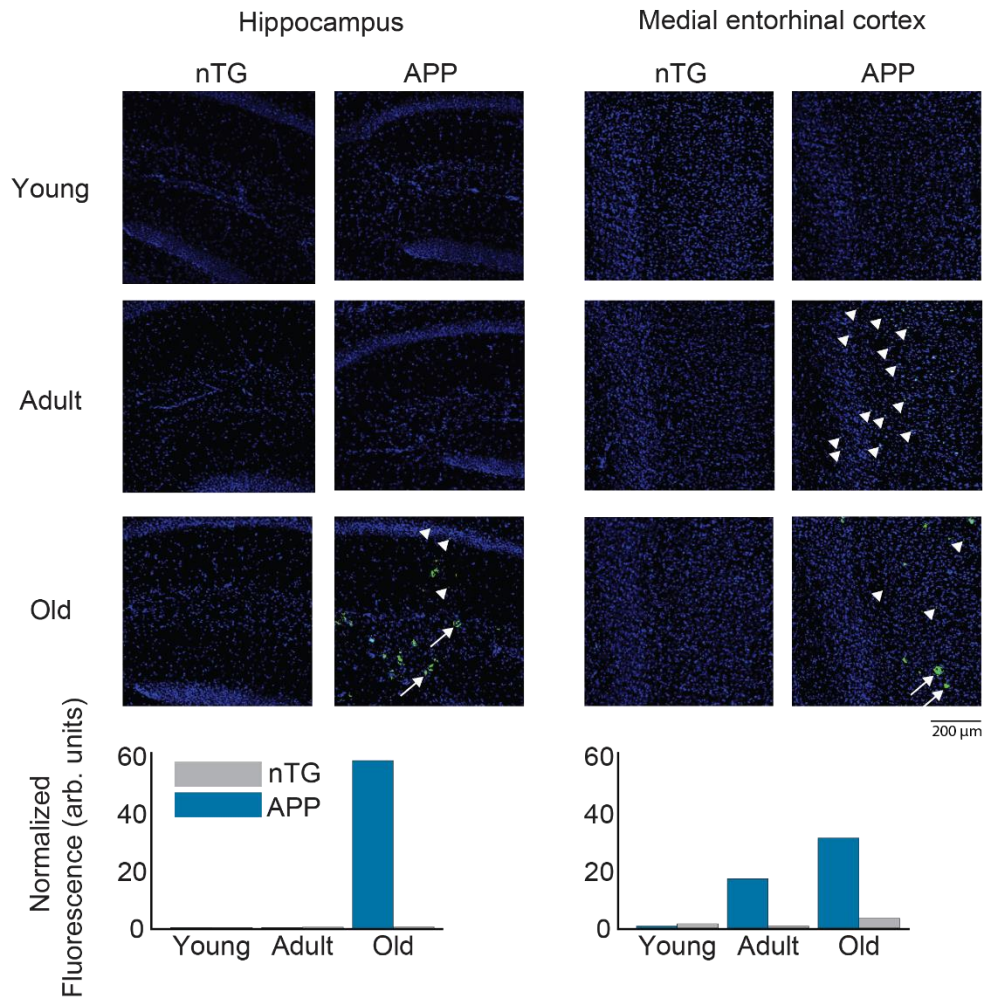

**Supplementary Figure 1. Quantification of amyloid-beta plaques in APP mice.** Representative examples of magnified brain sections of the hippocampus and medial entorhinal cortex of nTG and APP mice across 3 different age groups: young (3-4.5 mo.), adult (4.5-7 mo.) and old (18 mo.). Arrows and arrowheads indicate the presence of two different kinds of fluorescent morphologies. Adult APP mice have low levels of fluorescence in the medial entorhinal cortex, but the fluorescent signal is intracellular and does not resemble the bigger and widespread morphology observed in the hippocampus and medial entorhinal cortex of old APP mice. The fluorescence signal in adult APP mice might therefore represent early deposition of fibrillar amyloid-beta prior to the formation of mature plaques.

# Supplementary Figure 2. Page 1

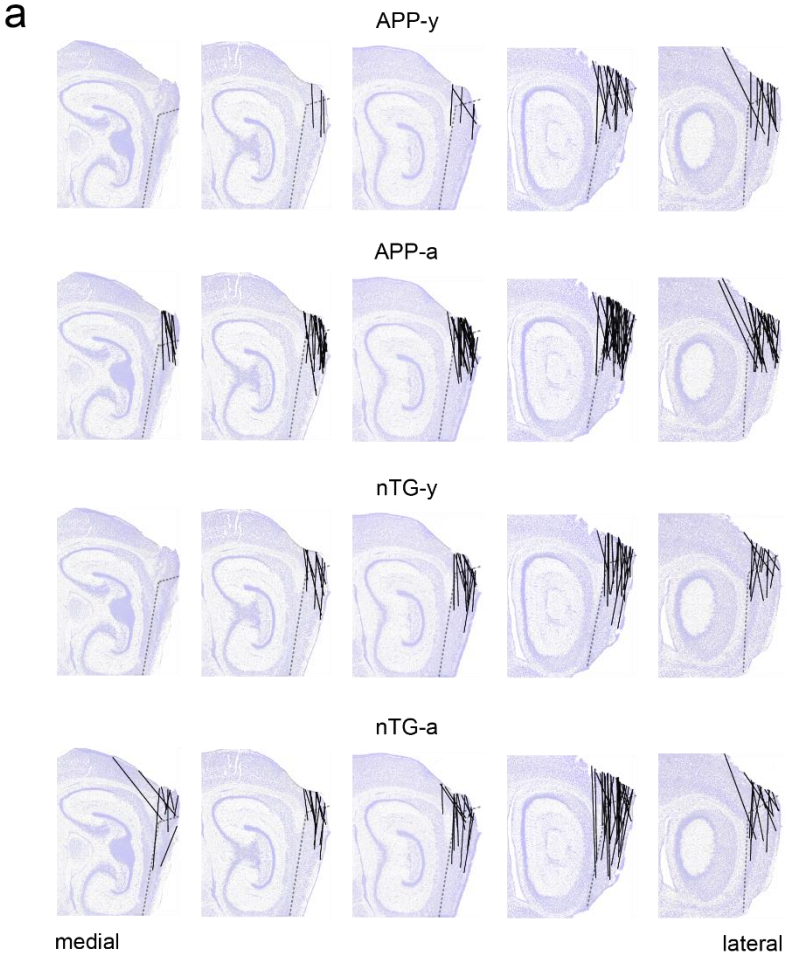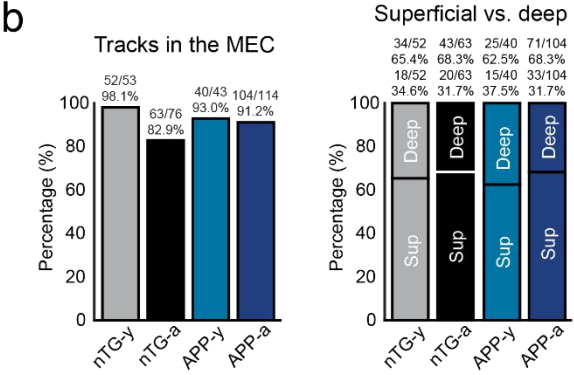

# Supplementary Figure 2. Page 2

C

nTG-y

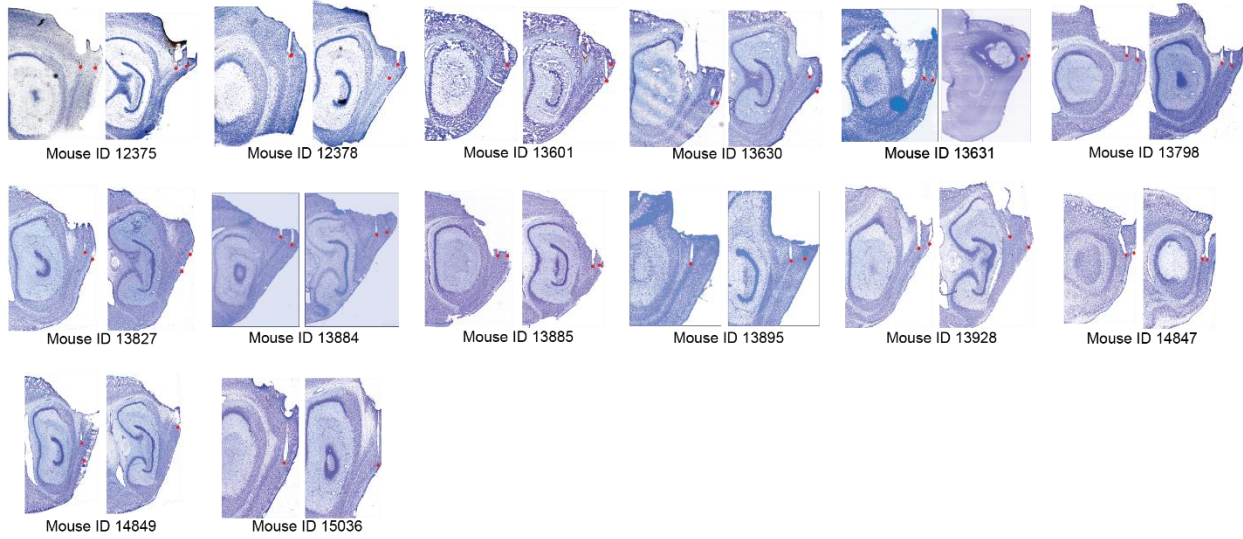

nTG-a

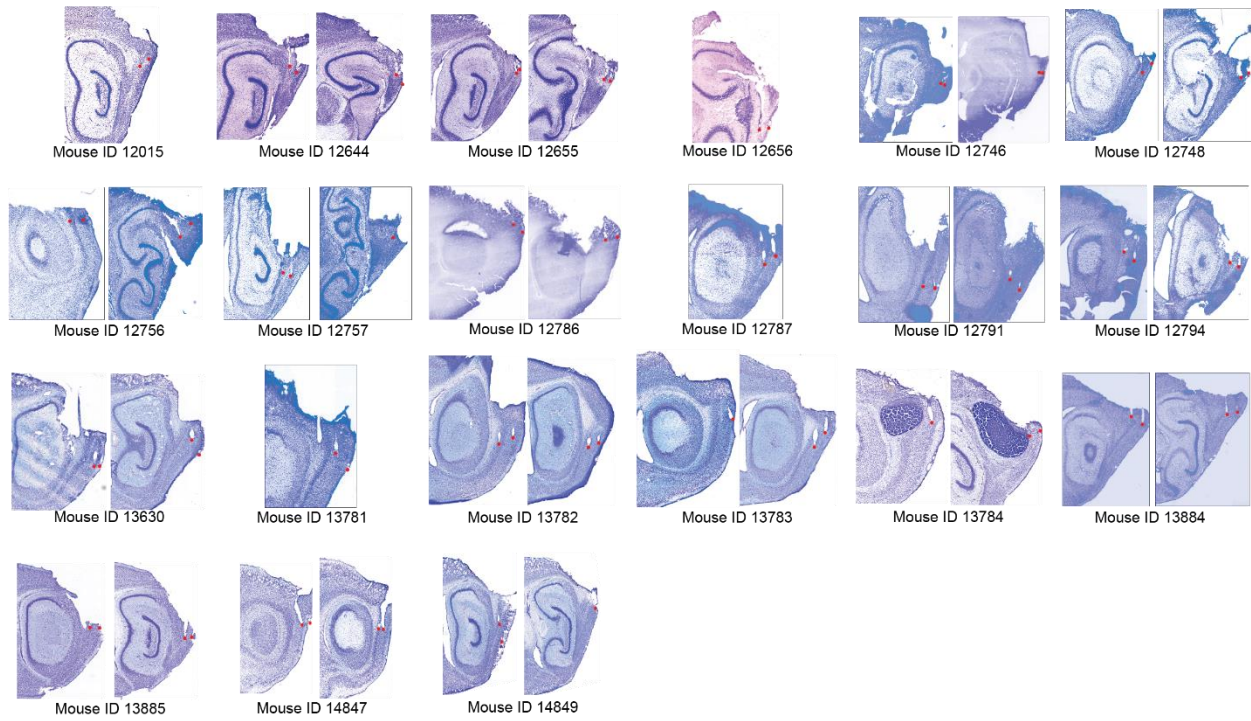



## Supplementary Figure 2. Page 3

### APP-y

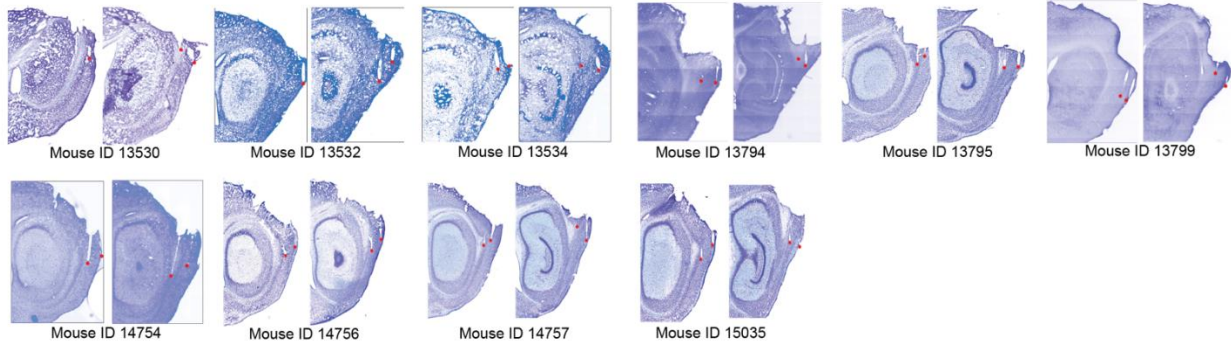

### APP-a

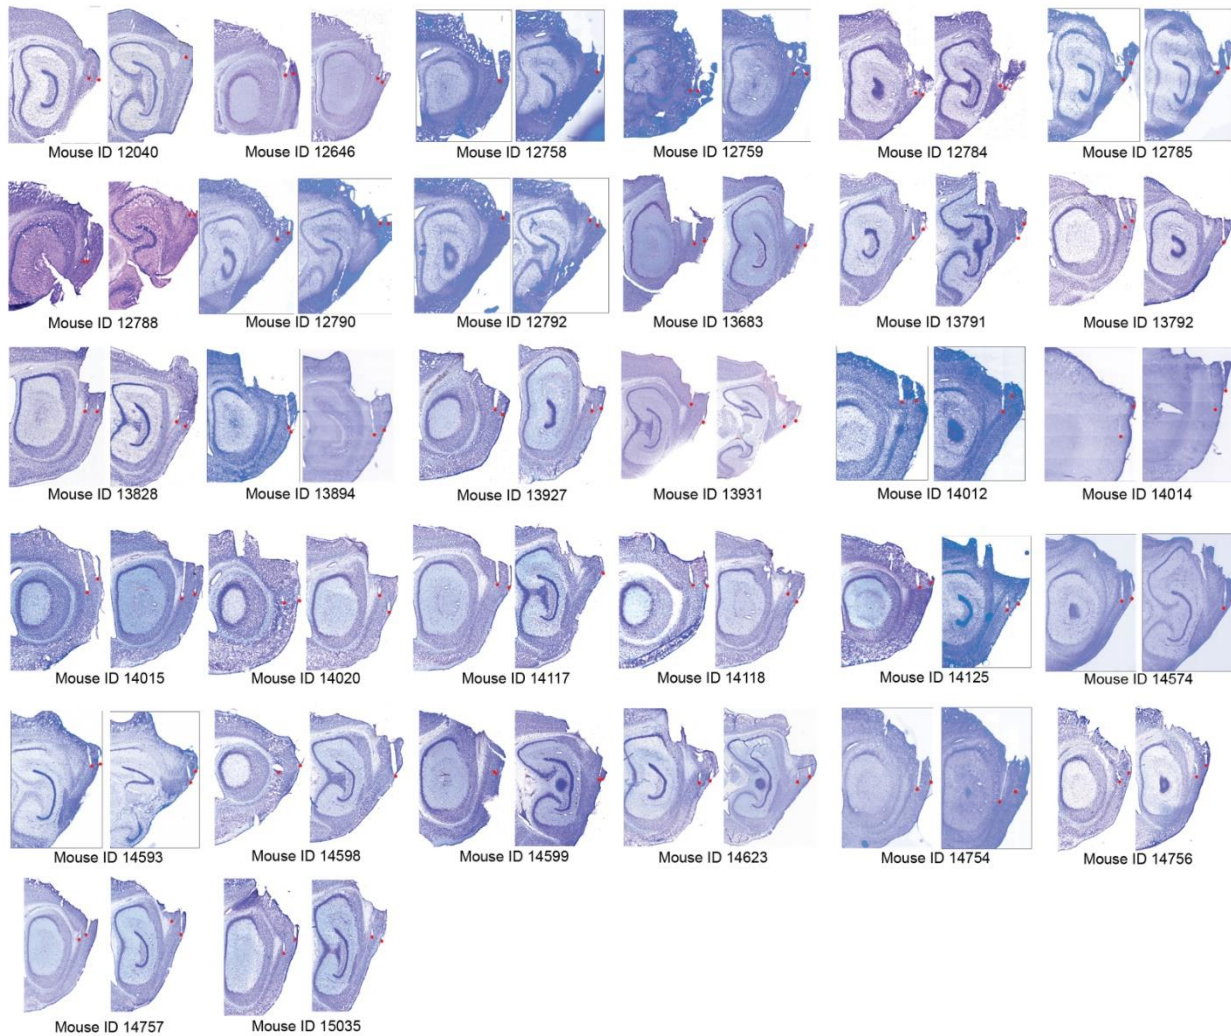

**Supplementary Figure 2. Tetrode track histology for MEC recordings.** a Averaged sagittal brain sections from the most lateral part of MEC (far right) to the start of parasubiculum (far left).



The individual track locations obtained from each animal were plotted along these sections by experimental group. **b** Quantification of track locations shown in **(a)**. (Left) Comparison of the percentage of tetrode tips located in the MEC between groups. (Right) Comparison of the percentage of tetrode tip in either the superficial or deep layers of MEC between groups. **c** Track locations of each animal ordered by genotype and age. The tips of tracks are highlighted with a red dot.

### Supplementary Figure 3

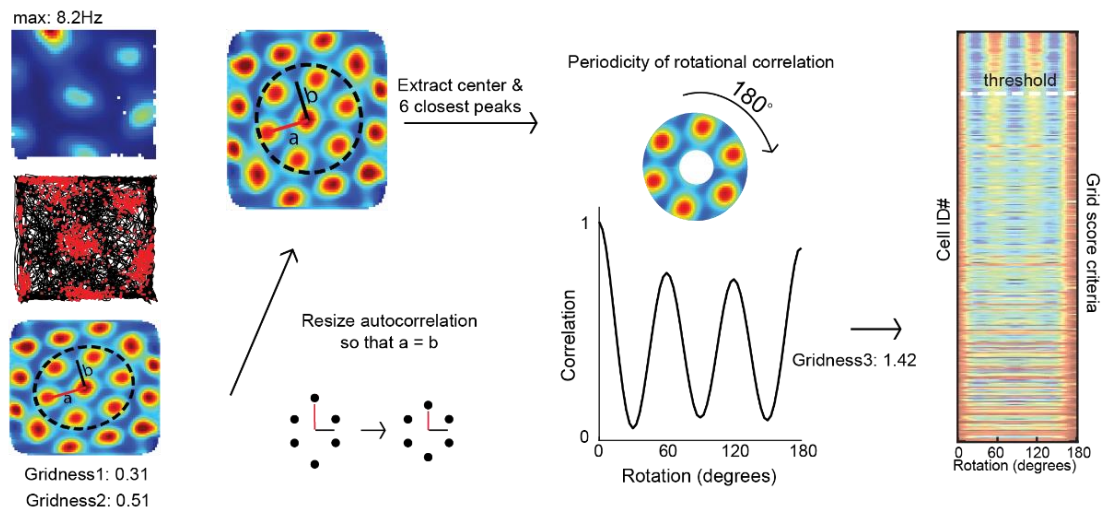

**Supplementary Figure 3. Creation of raster plots indicating the strength of rotational correlation of each cell.** Autocorrelations of grid cell rate maps were resized to ensure that the major and minor axes, a and b, were equal in length. The resulting image was then rotated 180 degrees to compute a color-coded row indicating the correlation strength at each degree of rotation. These rows were then sorted by decreasing order of grid score in a raster plot.

## Supplementary Figure 4

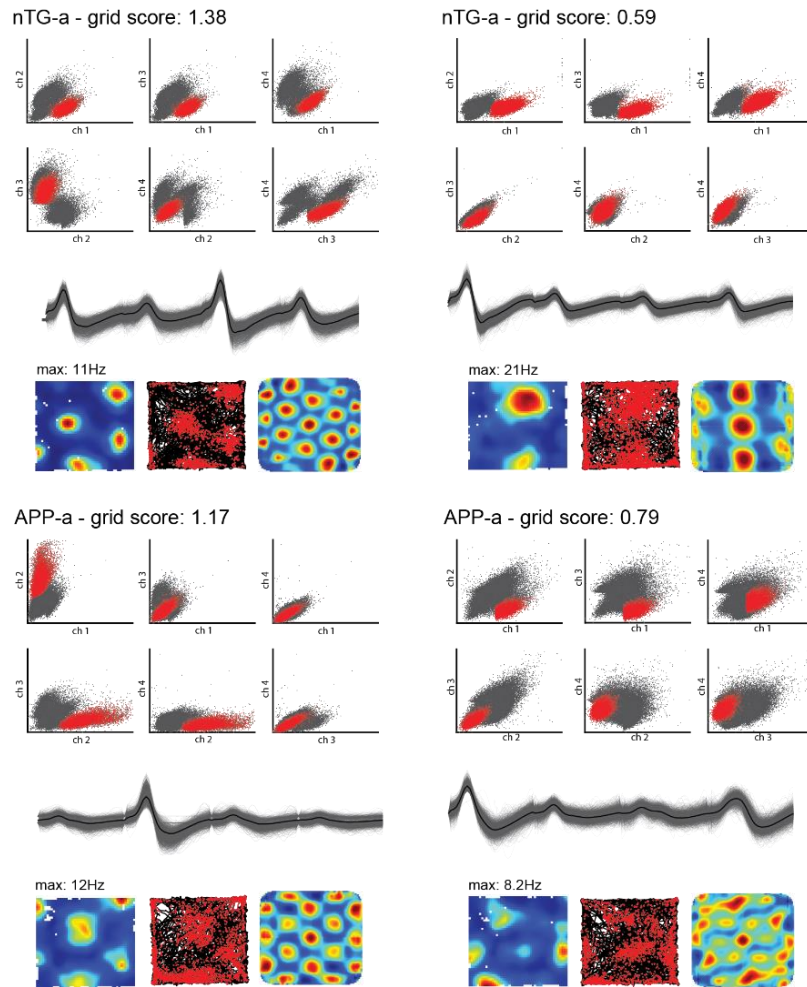

**Supplementary Figure 4. Example of well-isolated waveforms of four grid cells recorded in nTG-a and APP-a mice.** Cells with a high and low grid score were selected in each group for comparison. Each panel consists of the cell's grid score, the unit location in the six possible conformations of cluster space sorted by waveform amplitude, individual waveforms recorded across the four recording channels (grey) and the average waveform (black), the cell's rate map, trajectory map and rate map autocorrelation.

## Supplementary Figure 5

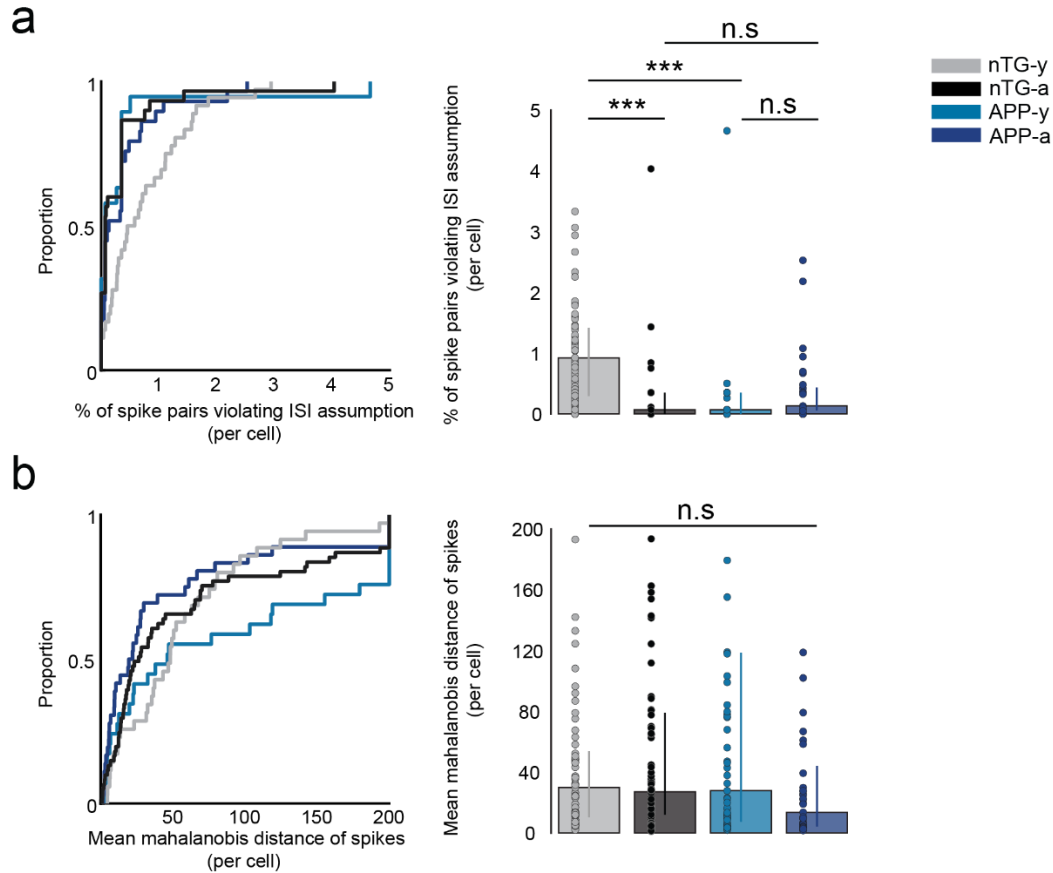

**Supplementary Figure 5. Spike isolation quality of grid cells. a** Percentage of spike pairs with an interspike interval (ISI) less than 1 millisecond (nTG-y vs. nTG-a:  $P = 1.3 \times 10^{-5}$ ; nTG-y vs. APP-y:  $P = 1.2 \times 10^{-4}$ ; APP-y vs. APP-a:  $P = 0.30$ ; nTG-a vs. APP-a:  $P = 0.45$ ), between groups (cells,  $n = 61$  for nTG-y;  $n = 30$  for nTG-a;  $n = 19$  for APP-y;  $n = 30$  for APP-a). These instances are considered non-physiological and may be due to faulty isolation or the presence of noisy spikes.

**b** Mean mahalanobis distance of spikes per grid cell (nTG-y vs. nTG-a:  $P = 0.65$ ; nTG-y vs. APP-y:  $P = 0.58$ ; APP-y vs. APP-a:  $P = 0.066$ ; nTG-a vs. APP-a:  $P = 0.18$ ), between groups (cells,  $n = 61$  for nTG-y;  $n = 97$  for nTG-a;  $n = 74$  for APP-y;  $n = 45$  for APP-a). nTG-y, non-transgenic young; nTG-a, non-transgenic adult; APP-y, APP young; APP-a, APP adult. Wilcoxon rank sum tests (two-sided) corrected for multiple comparisons using a Bonferroni-Holm correction were applied to analyze the data in Supplementary Fig. 5 **a-b**. Data in bar graphs are presented as median values  $\pm$  25<sup>th</sup> and 75<sup>th</sup> percentiles; \*\*\* $P < 0.001$ ; n.s, not significant. Source data are provided as a Source Data file.

## Supplementary Figure 6

Two-way ANOVA: Grid cells

| Source      | Sum Square | df  | MS     | F     | p         |
|-------------|------------|-----|--------|-------|-----------|
| Age         | 1.97       | 1   | 1.97   | 28.54 | = 1.89e-7 |
| Genotype    | 0.45       | 1   | 0.45   | 6.54  | = 0.011   |
| Interaction | 0.89       | 1   | 0.89   | 12.90 | = 3.86e-4 |
| Error       | 19.55      | 283 | 0.0069 |       |           |
| Total       | 22.27      | 286 |        |       |           |

Two-way ANOVA: Head-direction cells

| Source      | Sum Square | df   | MS   | F    | p       |
|-------------|------------|------|------|------|---------|
| Age         | 0.19       | 1    | 0.19 | 3.71 | = 0.054 |
| Genotype    | 0.17       | 1    | 0.17 | 3.25 | = 0.072 |
| Interaction | 0.01       | 1    | 0.01 | 0.2  | = 0.65  |
| Error       | 67.45      | 1311 | 0.05 |      |         |
| Total       | 67.77      | 1314 |      |      |         |

Two-way ANOVA: Non-grid spatial cells

| Source      | Sum Square | df  | MS      | F    | p      |
|-------------|------------|-----|---------|------|--------|
| Age         | 941105     | 1   | 941105  | 0.48 | = 0.49 |
| Genotype    | 933809     | 1   | 933809  | 0.47 | = 0.49 |
| Interaction | 735051     | 1   | 735051  | 0.37 | = 0.54 |
| Error       | 7.6e8      | 386 | 1969180 |      |        |
| Total       | 7.6e8      | 389 |         |      |        |

**Supplementary Figure 6. Spatial tuning of grid cells, but not head-direction cells or non-grid spatial cells, is disrupted across age in APP mice.** Two-way unbalanced ANOVAs compare the effects of age, genotype, and interaction on spatial tuning scores for grid cells (grid score), head-direction cells (mean resultant length) and non-grid spatial cells (field size  $\text{cm}^2$ ).

df = degrees of freedom, MS = mean square.

## Supplementary Figure 7

a

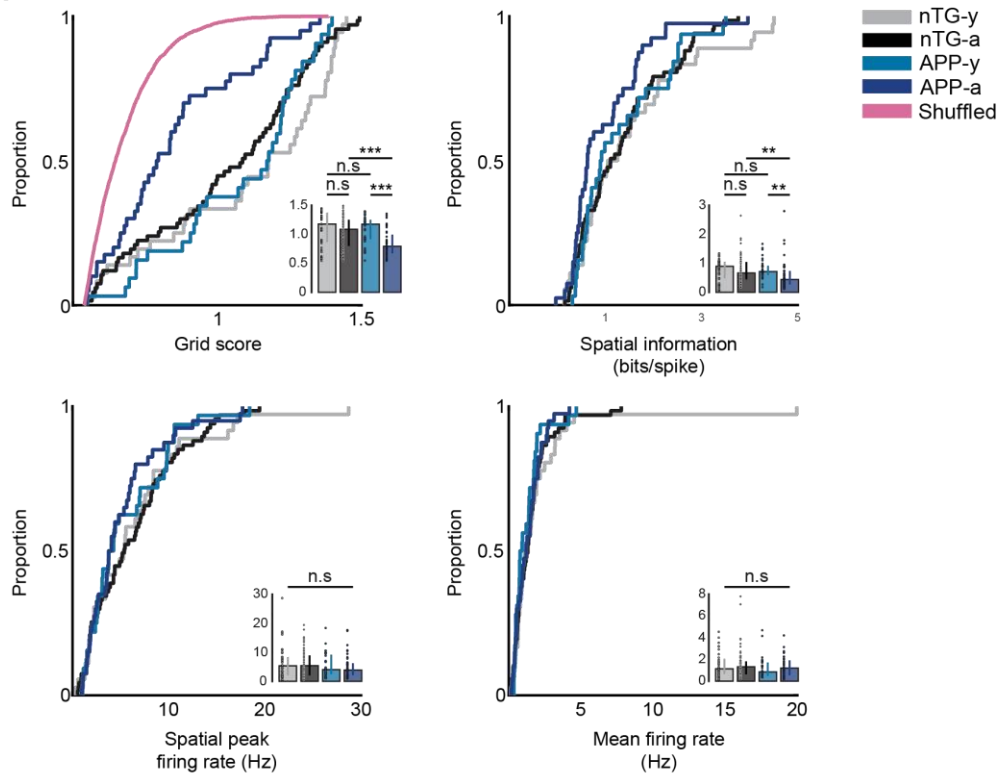

b

**Two-way ANOVA: Grid cells**

| Source      | Sum Square | df  | MS   | F     | p         |
|-------------|------------|-----|------|-------|-----------|
| Age         | 0.90       | 1   | 0.90 | 12.81 | = 0.00045 |
| Genotype    | 0.44       | 1   | 0.44 | 6.31  | = 0.013   |
| Interaction | 0.28       | 1   | 0.28 | 4.04  | = 0.046   |
| Error       | 12.06      | 171 | 0.07 |       |           |
| Total       | 13.62      | 174 |      |       |           |

**Supplementary Figure 7. Grid cell spatial tuning remains impaired in adult APP mice when duplicate cell counts are removed.** **a** Grid score (nTG-y vs. nTG-a:  $P = 0.19$ ; nTG-y vs. APP-y:  $P = 0.44$ ; APP-y vs. APP-a:  $P = 4.1 \times 10^{-4}$ ; nTG-a vs. APP-a:  $P = 0.0031$ ), spatial information (nTG-y vs. nTG-a:  $P = 0.73$ ; nTG-y vs. APP-y:  $P = 0.70$ ; APP-y vs. APP-a:  $P = 0.0044$ ; nTG-a vs. APP-a:  $P = 0.0072$ ), spatial peak firing rate (nTG-y vs. nTG-a:  $P = 0.89$ ; nTG-y vs. APP-y:  $P = 0.64$ ; APP-y vs. APP-a:  $P = 0.73$ ; nTG-a vs. APP-a:  $P = 0.22$ ), and mean firing rate (nTG-y vs. nTG-a:  $P = 0.67$ ; nTG-y vs. APP-y:  $P = 0.23$ ; APP-y vs. APP-a:  $P = 0.45$ ; nTG-a vs. APP-a:  $P = 0.80$ ) between groups (cells,  $n = 36$  for nTG-y;  $n = 67$  for nTG-a;  $n = 32$  for APP-y;  $n = 40$  for APP-a). **b** Two-way unbalanced ANOVAs comparing the effects of age, genotype, and interaction on grid scores for grid cells. df= degrees of freedom, MS = mean square. nTG-y, non-transgenic



young; nTG-a, non-transgenic adult; APP-y, APP young; APP-a, APP adult. Wilcoxon rank sum tests (two-sided) corrected for multiple comparisons using a Bonferroni-Holm correction were applied to analyze the data in Supplementary Fig. 7 a. Data in bar graphs are presented as median values  $\pm$  25<sup>th</sup> and 75<sup>th</sup> percentiles; \*\* $P < 0.01$ , \*\*\* $P < 0.001$ ; n.s, not significant. Source data are provided as a Source Data file.

## Supplementary Figure 8

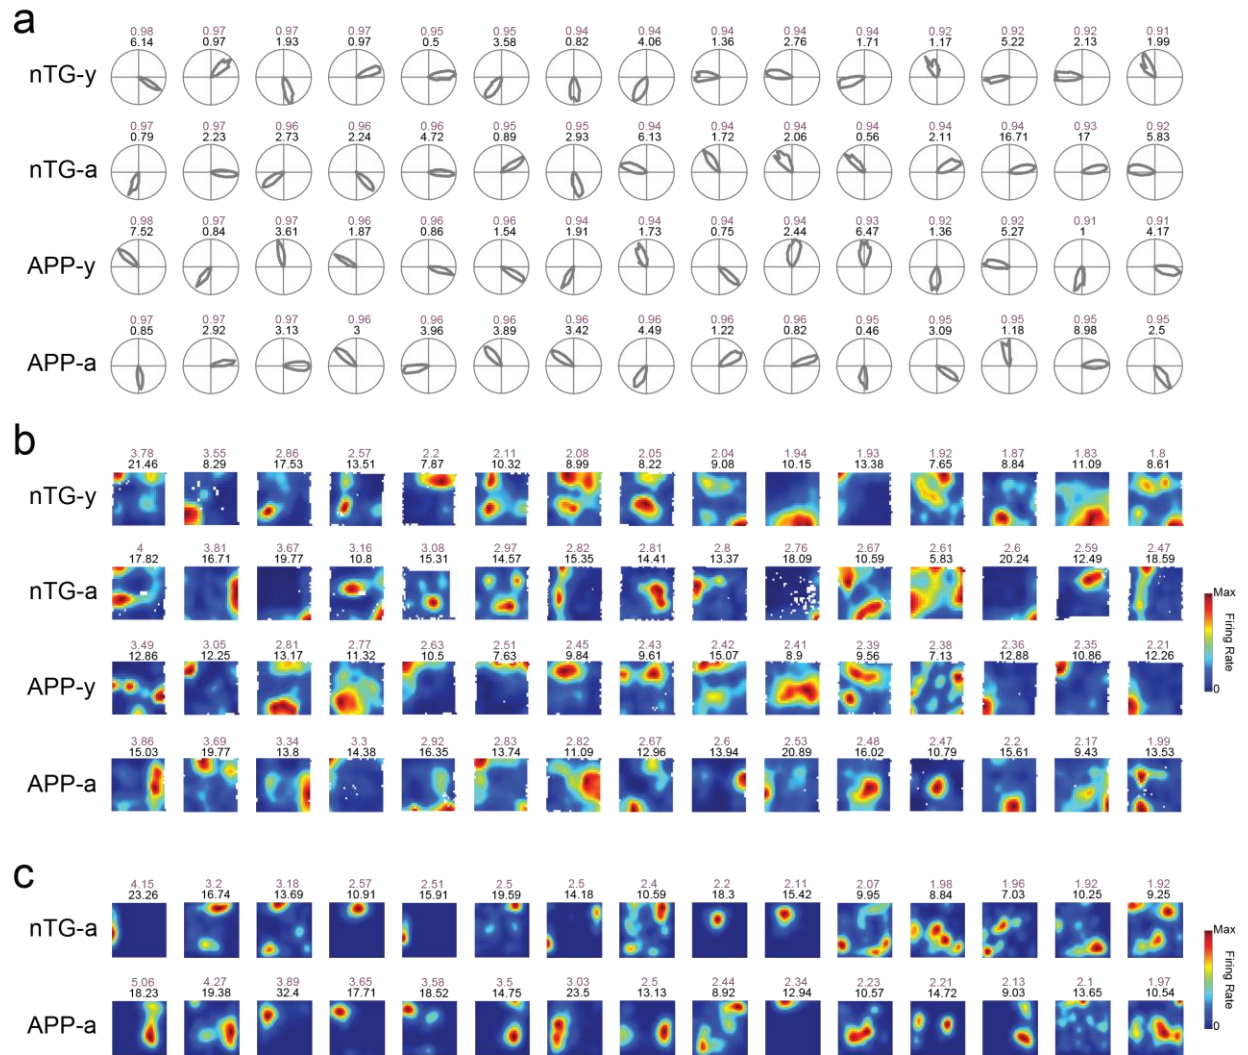

**Supplementary Figure 8. Top 15 quality cells across groups. a** Polar rate maps for head direction cells from each experimental group. Each row includes 15 head direction cells with the highest mean resultant scores sorted in descending order. The mean resultant length (light purple) and peak firing rate (Hz) (black) of each cell are indicated on top of their respective rate maps. **b** Same as (a) but for non-grid spatially-tuned cells. Cells are sorted by the highest spatial information scores in descending order. The spatial information (light purple) and peak firing rate (Hz) (black) of each cell are indicated on top of their respective rate maps. **c** Same as (a) but for place cells. Cells are sorted by the highest spatial information scores in descending order. The spatial information (light purple) and peak firing rate (Hz) (black) of each cell are indicated on top of their respective rate maps.

# Supplementary Figure 9

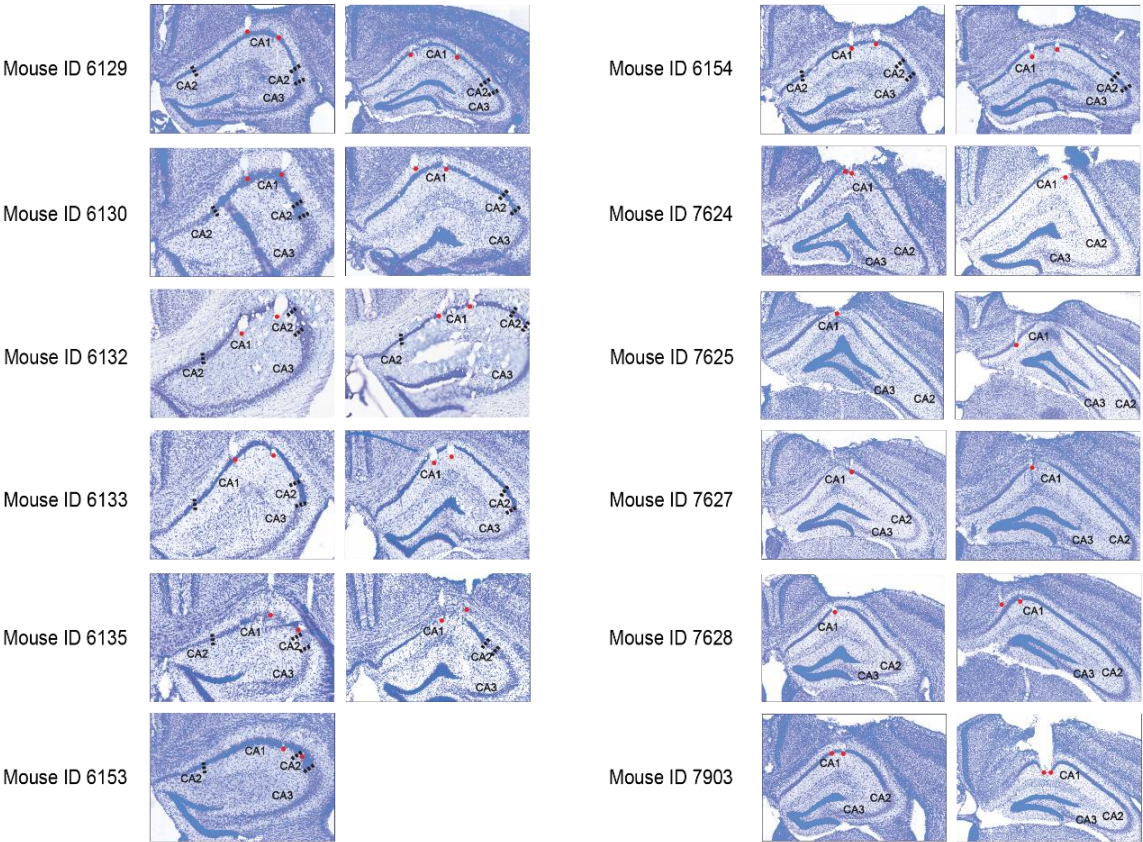

**Supplementary Figure 9. Tetrode track histology for CA1 recordings.** Track tips in each animal are shown in red dots.

## Supplementary Figure 10

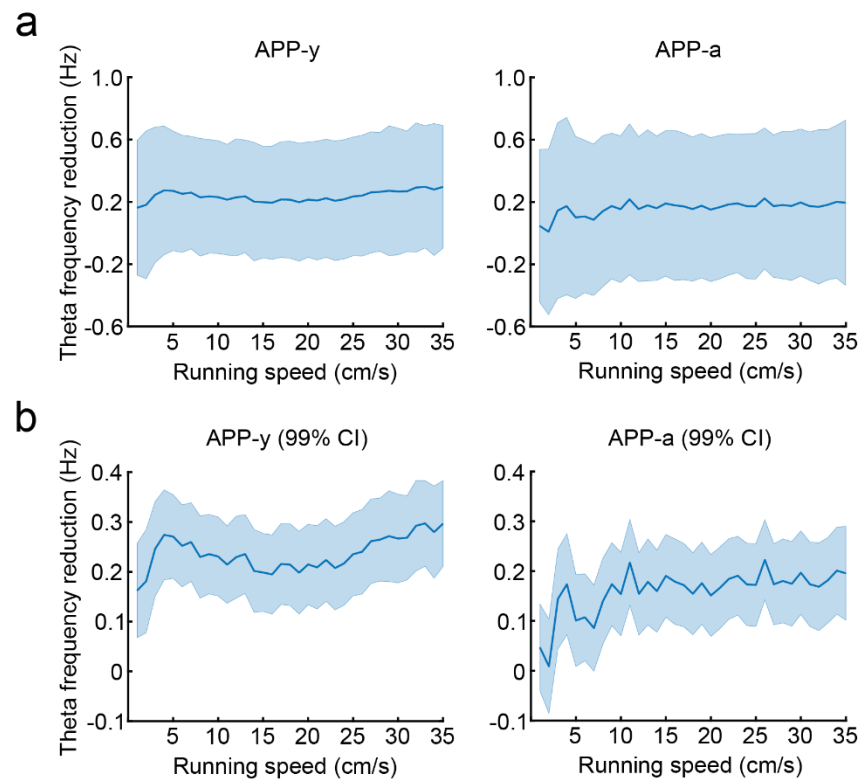

**Supplementary Figure 10. The magnitude of theta frequency reduction in APP mice is roughly equal across all running speeds. a** Reduction of theta frequency in APP-y (left) and APP-a (right) mice across running speeds (APP mice theta frequencies were subtracted from age-matched non-transgenic counterparts). Data are presented as mean values  $\pm$  standard deviation. **b** Same as (a) but data are presented as mean values  $\pm$  99% confidence intervals.

# Supplementary Figure 11

a

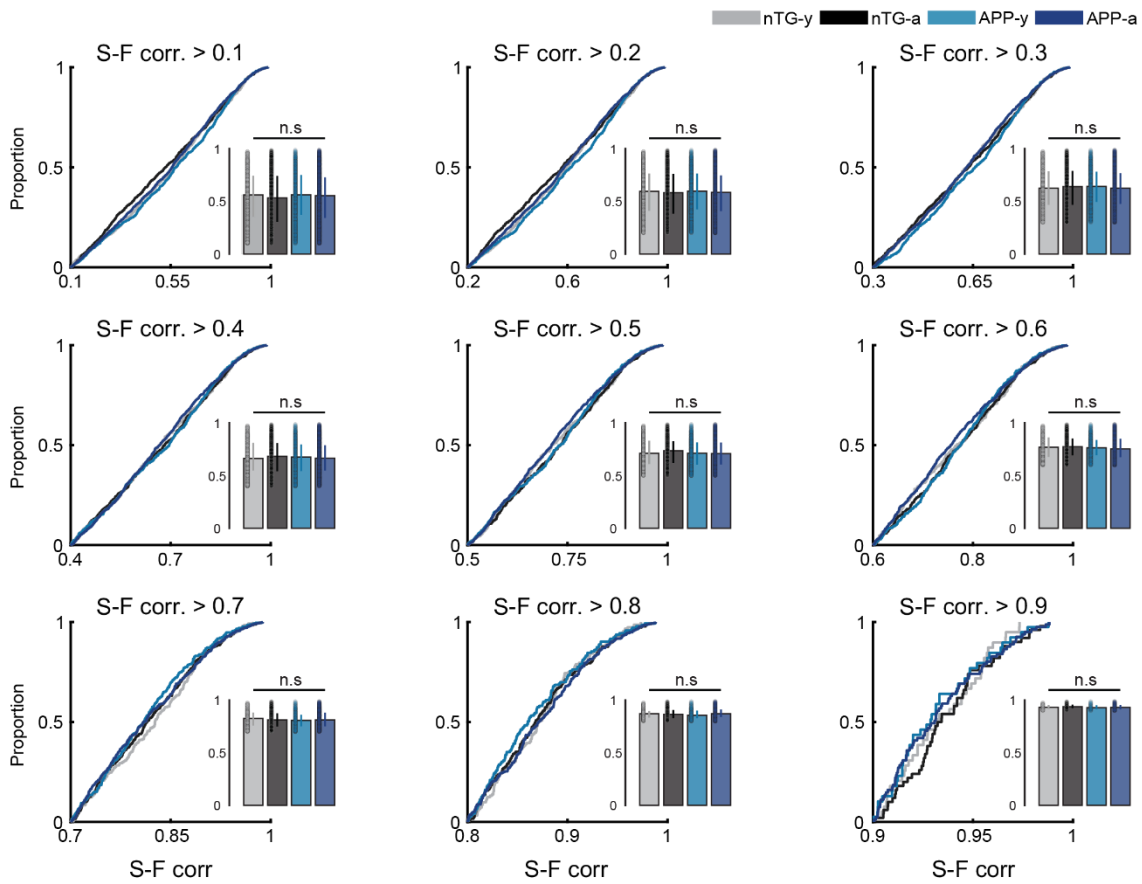

b

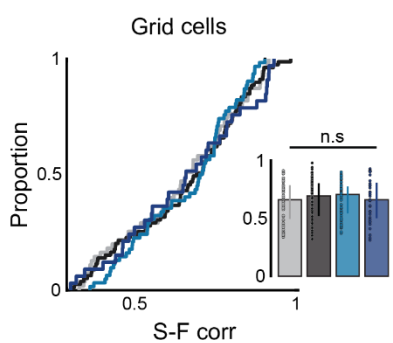

c

Two-way ANOVA: S-F corr. for grid cells

| Source      | Sum Square | df  | MS      | F    | p      |
|-------------|------------|-----|---------|------|--------|
| Age         | 0.00065    | 1   | 0.00065 | 0.02 | = 0.88 |
| Genotype    | 0.0034     | 1   | 0.0034  | 0.11 | = 0.74 |
| Interaction | 0.00512    | 1   | 0.00512 | 0.17 | = 0.68 |
| Error       | 6.71       | 225 | 0.0298  |      |        |
| Total       | 6.72       | 228 |         |      |        |

**Supplementary Figure 11. Intact speed coding in APP mice.** a Running speed vs. firing rate correlation (S-F corr.) of putative speed cells. Cells were selected via a S-F corr. threshold ranging from 0.1-0.9.

0.1: nTG-y-nTG-a:  $P = 0.17$ ; nTG-y-APP-y:  $P = 0.69$ ; APP-y-APP-a:  $P = 0.23$ ; nTG-a-APP-a:  $P = 0.42$ ;  $n = 772$  nTG-y;  $949$  nTG-a;  $686$  APP-y;  $1515$  APP-a



0.2: nTG-y-nTG-a:  $P = 0.21$ ; nTG-y-APP-y:  $P = 0.72$ ; APP-y-APP-a:  $P = 0.16$ ; nTG-a-APP-a:  $P = 0.70$ ;  $n = 696$  nTG-y; 846 nTG-a; 619 APP-y; 1368 APP-a

0.3: nTG-y-nTG-a:  $P = 0.71$ ; nTG-y-APP-y:  $P = 0.41$ ; APP-y-APP-a:  $P = 0.23$ ; nTG-a-APP-a:  $P = 0.47$ ;  $n = 629$  nTG-y; 725 nTG-a; 552 APP-y; 1206 APP-a

0.4: nTG-y-nTG-a:  $P = 0.61$ ; nTG-y-APP-y:  $P = 0.65$ ; APP-y-APP-a:  $P = 0.93$ ; nTG-a-APP-a:  $P = 0.29$ ;  $n = 537$  nTG-y; 620 nTG-a; 493 APP-y; 1033 APP-a

0.5: nTG-y-nTG-a:  $P = 0.42$ ; nTG-y-APP-y:  $P = 0.49$ ; APP-y-APP-a:  $P = 0.78$ ; nTG-a-APP-a:  $P = 0.15$ ;  $n = 442$  nTG-y; 507 nTG-a; 407 APP-y; 859 APP-a

0.6: nTG-y-nTG-a:  $P = 0.64$ ; nTG-y-APP-y:  $P = 0.74$ ; APP-y-APP-a:  $P = 0.39$ ; nTG-a-APP-a:  $P = 0.06$ ;  $n = 340$  nTG-y; 400 nTG-a; 308 APP-y; 658 APP-a

0.7: nTG-y-nTG-a:  $P = 0.32$ ; nTG-y-APP-y:  $P = 0.06$ ; APP-y-APP-a:  $P = 0.40$ ; nTG-a-APP-a:  $P = 0.86$ ;  $n = 238$  nTG-y; 297 nTG-a; 224 APP-y; 447 APP-a

0.8: nTG-y-nTG-a:  $P = 0.53$ ; nTG-y-APP-y:  $P = 0.13$ ; APP-y-APP-a:  $P = 0.06$ ; nTG-a-APP-a:  $P = 0.35$ ;  $n = 142$  nTG-y; 167 nTG-a; 119 APP-y; 244 APP-a

0.9: nTG-y-nTG-a:  $P = 0.54$ ; nTG-y-APP-y:  $P = 0.72$ ; APP-y-APP-a:  $P = 0.99$ ; nTG-a-APP-a:  $P = 0.22$ ;  $n = 35$  nTG-y; 44 nTG-a; 30 APP-y; 80 APP-a

**b** Grid cell S-F corr. (nTG-y-nTG-a:  $P = 0.65$ ; nTG-y-APP-y:  $P = 0.66$ ; APP-y-APP-a:  $P = 0.99$ ; nTG-a-APP-a:  $P = 0.98$ ) between groups ( $n = 55$  nTG-y; 79 nTG-a; 62 APP-y; 33 APP-a). **c** Two-way unbalanced ANOVA comparing the effects of age and genotype on S-F corr. of grid cells. df = degrees of freedom, MS = mean square. Wilcoxon rank sum tests (two-sided) with Bonferroni-Holm's correction were applied to Supplementary Fig. 11 **a-b**. Data in bar graphs are presented as medians  $\pm$  25<sup>th</sup> and 75<sup>th</sup> percentiles; n.s, not significant. Source data are provided as a Source Data file.

## Supplementary Figure 12

Two-way ANOVA: Mean 2D displacement

| Source      | Sum Square | df  | MS    | F    | p        |
|-------------|------------|-----|-------|------|----------|
| Genotype    | 33.79      | 1   | 33.79 | 8.43 | = 0.0038 |
| Cell type   | 38.57      | 2   | 19.29 | 4.81 | = 0.0084 |
| Interaction | 34.83      | 2   | 17.41 | 4.34 | = 0.013  |
| Error       | 3296.64    | 822 | 4.01  |      |          |
| Total       | 3410.74    | 827 |       |      |          |

Pairwise comparisons: Tukey's test

| Comparisons                          | Mean diff.   | 95% C.I. for true mean diff. |              | p             |
|--------------------------------------|--------------|------------------------------|--------------|---------------|
|                                      |              | LL                           | UL           |               |
| <b>nTG-a grid - APP-a grid</b>       | <b>-1.23</b> | <b>-2.23</b>                 | <b>-0.23</b> | <b>0.0064</b> |
| nTG-a grid - nTG-a nongrid           | -0.69        | -1.56                        | 0.17         | 0.2           |
| nTG-a grid - APP-a nongrid           | -0.79        | -1.58                        | 0.00         | 0.049         |
| nTG-a grid - nTG-a place             | -1.08        | -1.77                        | -0.39        | 0.00012       |
| nTG-a grid - APP-a place             | -1.18        | -1.87                        | -0.49        | 1.60E-05      |
| APP-a grid - nTG-a nongrid           | 0.54         | -0.50                        | 1.57         | 0.68          |
| APP-a grid - APP-a nongrid           | 0.44         | -0.54                        | 1.41         | 0.8           |
| APP-a grid - nTG-a place             | 0.15         | -0.75                        | 1.04         | 1             |
| APP-a grid - APP-a place             | 0.05         | -0.84                        | 0.94         | 1             |
| <b>nTG-a nongrid - APP-a nongrid</b> | <b>-0.10</b> | <b>-0.93</b>                 | <b>0.73</b>  | <b>1</b>      |
| nTG-a nongrid - nTG-a place          | -0.39        | -1.13                        | 0.35         | 0.66          |
| nTG-a nongrid - APP-a place          | -0.49        | -1.22                        | 0.25         | 0.41          |
| APP-a nongrid - nTG-a place          | -0.29        | -0.94                        | 0.36         | 0.8           |
| APP-a nongrid - APP-a place          | -0.39        | -1.03                        | 0.26         | 0.53          |
| <b>nTG-a place - APP-a place</b>     | <b>-0.10</b> | <b>-0.61</b>                 | <b>0.42</b>  | <b>0.99</b>   |

**Supplementary Figure 12. Mean 2D displacement is higher in grid cells, but not non-grid spatially-tuned cells or place cells, in adult APP mice.** Two-way unbalanced ANOVAs compare the effects of genotype, cell type, and interaction on the mean 2D displacement scores for grid cells, non-grid spatially-tuned cells and place cells. Grid cells, non-grid spatially-tuned cells and place cells were included in the “Cell type” factor. Pairwise comparisons with Tukey’s test at a corrected alpha value of 0.05 are shown at the bottom. The 3 comparisons of interest (nTG-a grid - APP-a grid; nTG-a nongrid - APP-a nongrid; nTG-a place - APP-a place) are bolded.

df = degrees of freedom, MS = mean square.

# Supplementary Figure 13. Page 1

a

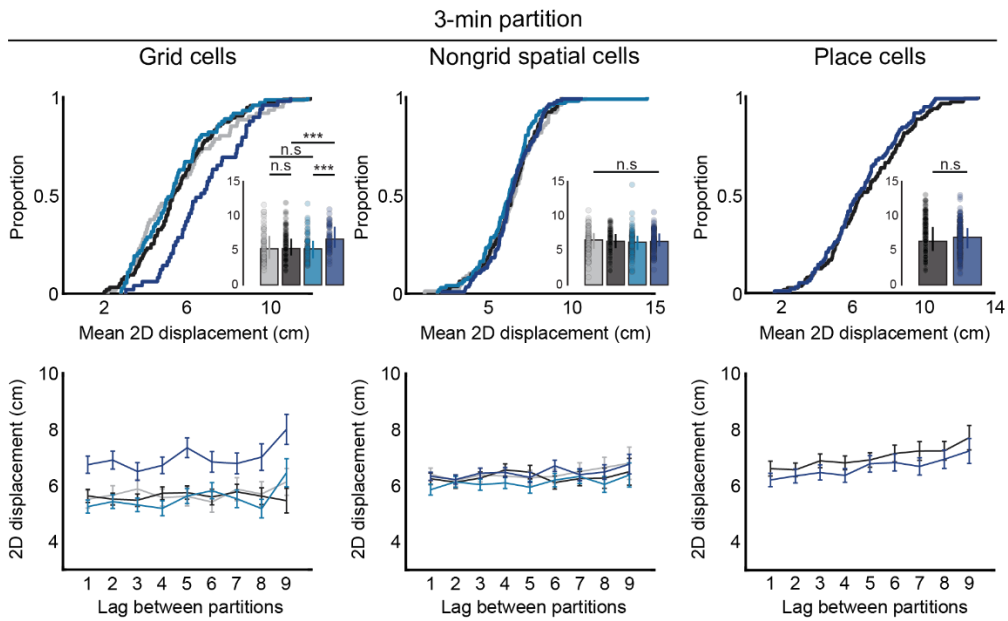

b

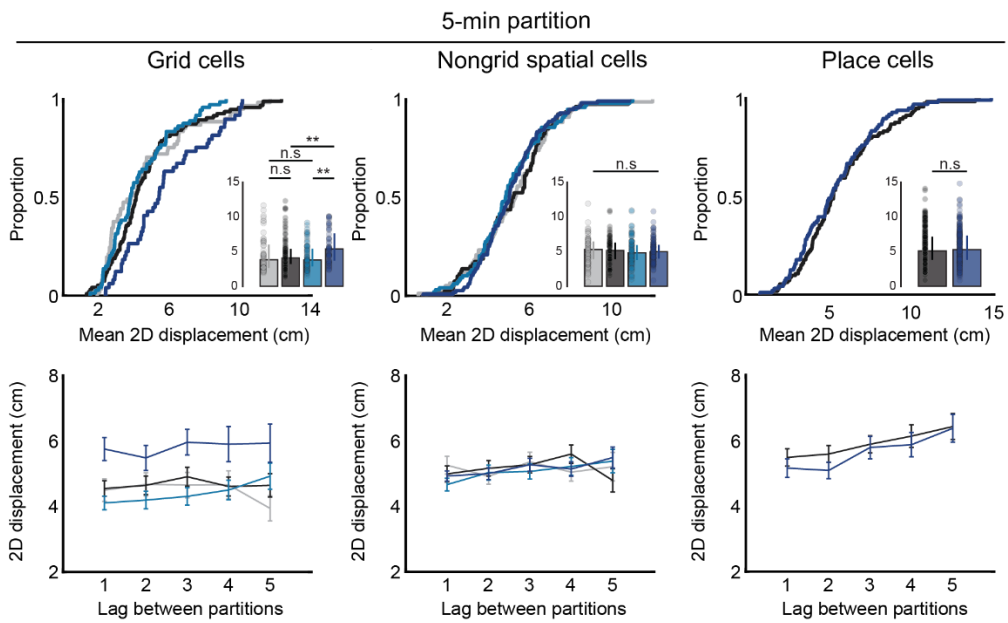

# Supplementary Figure 13. Page 2

C

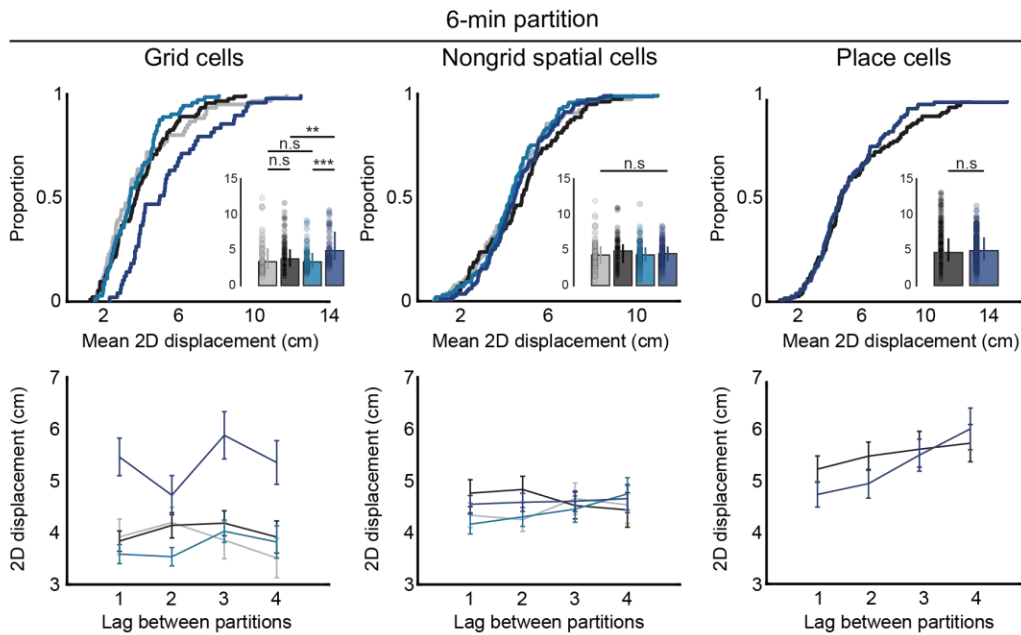

d

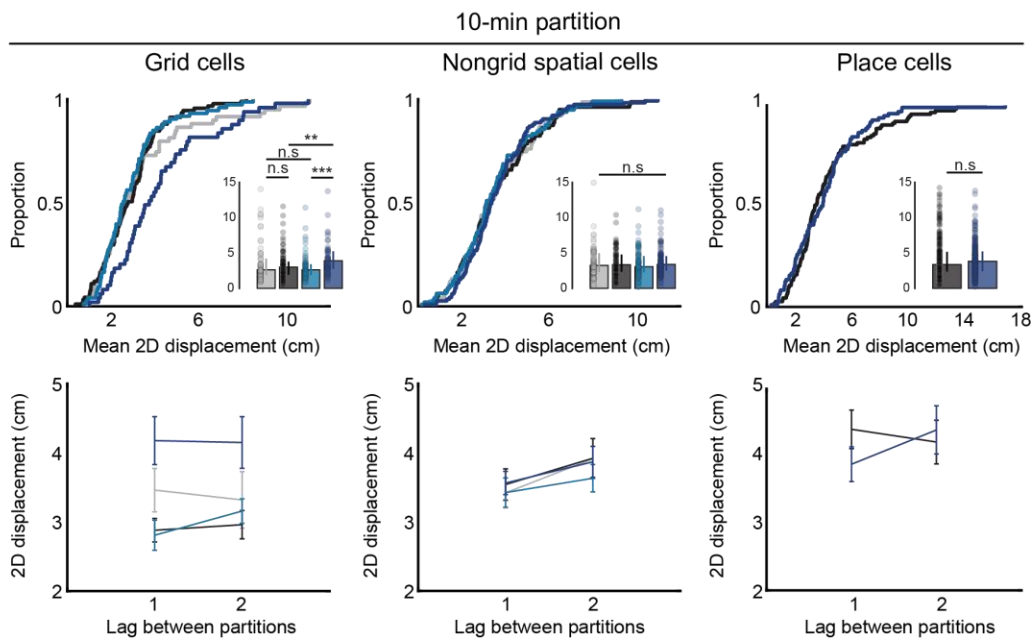

**Supplementary Figure 13. Reduced grid cell spatial stability in adult APP mice persists across different partition lengths. a 3-minute partition analyses.** Two-dimensional displacement of grid cells (nTG-y-nTG-a:  $P = 0.76$ ; nTG-y-APP-y:  $P = 0.76$ ; APP-y-APP-a:  $P = 9.1 \times 10^{-4}$ ; nTG-a-APP-a:  $P = 3.4 \times 10^{-4}$ ), non-grid spatially-tuned cells (nTG-y-nTG-a:  $P = 0.74$ ; nTG-y-

APP-y:  $P = 0.24$ ; APP-y-APP-a:  $P = 0.19$ ; nTG-a-APP-a:  $P = 0.87$ ), and place cells (nTG-a-APP-a:  $P = 0.35$ ) between groups (grid cells,  $n = 61$  nTG-y; 95 nTG-a; 73 APP-y; 49 APP-a; non-grid spatially-tuned cells, 77 nTG-y; 80 nTG-a; 98 APP-y; 115 APP-a; place cells, 243 nTG-a; 247 APP-a). (bottom-row) Two-dimensional displacement of grid cells, non-grid spatially-tuned cells and place cells as a function of lags between partitions. Dots indicate mean values and error bars indicate SEM. **b-d** Five-minute (grid cell: nTG-y-nTG-a:  $P = 0.35$ ; nTG-y-APP-y:  $P = 0.98$ ; APP-y-APP-a:  $P = 0.0019$ ; nTG-a-APP-a:  $P = 0.01$ ; non-grid cell: nTG-y-nTG-a:  $P = 0.92$ ; nTG-y-APP-y:  $P = 0.35$ ; APP-y-APP-a:  $P = 0.65$ ; nTG-a-APP-a:  $P = 0.58$ ; place cell: nTG-a-APP-a:  $P = 0.67$ ), 6-minute (grid cell: nTG-y vs. nTG-a:  $P = 0.39$ ; nTG-y vs. APP-y:  $P = 1$ ; APP-y vs. APP-a:  $P = 6.0 \times 10^{-5}$ ; nTG-a vs. APP-a:  $P = 0.0025$ ; non-grid cell: nTG-y vs. nTG-a:  $P = 0.31$ ; nTG-y vs. APP-y:  $P = 0.96$ ; APP-y vs. APP-a:  $P = 0.41$ ; nTG-a vs. APP-a:  $P = 0.67$ ; place cell: nTG-a vs. APP-a:  $P = 0.47$ ) and 10-minute (grid cell: nTG-y vs. nTG-a:  $P = 0.93$ ; nTG-y vs. APP-y:  $P = 0.53$ ; APP-y vs. APP-a:  $P = 8.4 \times 10^{-4}$ ; nTG-a vs. APP-a:  $P = 0.0026$ ; non-grid cell: nTG-y vs. nTG-a:  $P = 0.92$ ; nTG-y vs. APP-y:  $P = 0.65$ ; APP-y vs. APP-a:  $P = 0.35$ ; nTG-a vs. APP-a:  $P = 0.79$ ; place cell: nTG-a vs. APP-a:  $P = 0.61$ ) partitions between groups. Wilcoxon rank sum tests (two-sided) corrected for multiple comparisons using Bonferroni-Holm's correction were applied to Supplementary Fig. 13 **a-d**. Data in bar graphs are presented as median values  $\pm$  25<sup>th</sup> and 75<sup>th</sup> percentiles; \*\* $P < 0.01$ , \*\*\* $P < 0.001$ ; n.s., not significant. Source data are provided as a Source Data file.



## Supplementary Figure 14

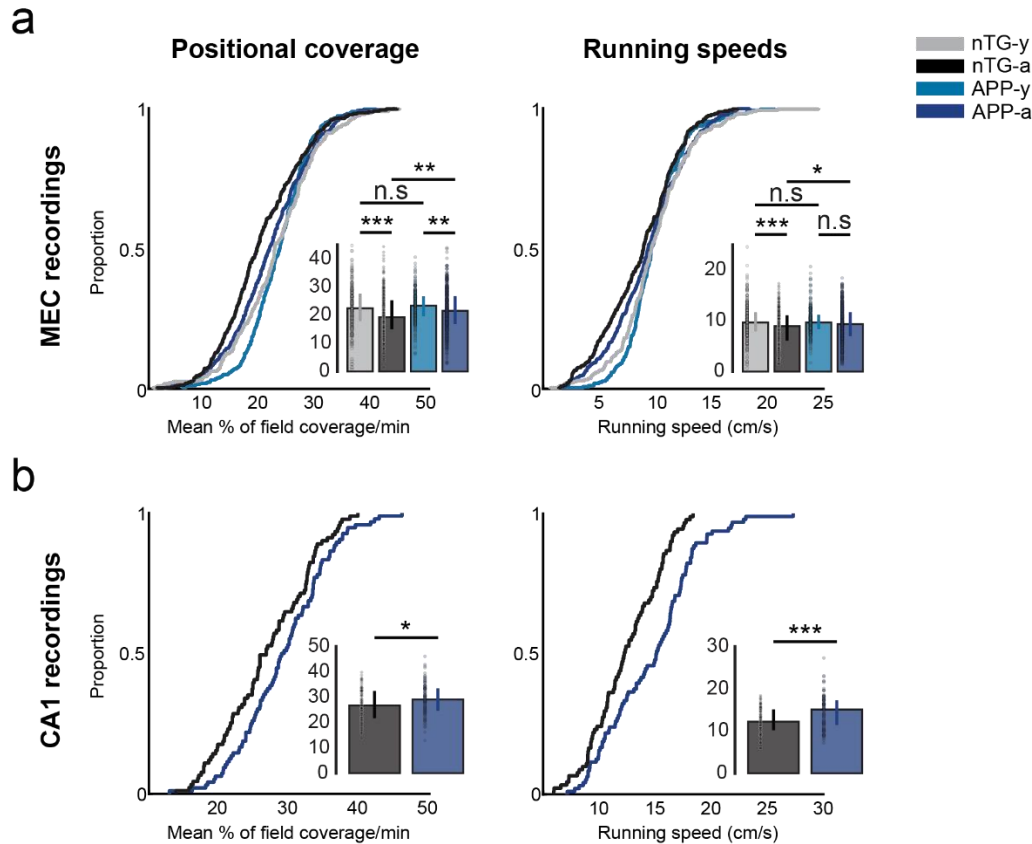

**Supplementary Figure 14. Positional coverage and running speeds across groups for MEC and CA1 recordings.** **a** Mean % of the environment covered per minute (nTG-y vs. nTG-a:  $P = 3.3 \times 10^{-5}$ ; nTG-y vs. APP-y:  $P = 0.51$ ; APP-y vs. APP-a:  $P = 0.0053$ ; nTG-a vs. APP-a:  $P = 0.0041$ ), and average running speed (nTG-y vs. nTG-a:  $P = 9.1 \times 10^{-4}$ ; nTG-y vs. APP-y:  $P = 0.91$ ; APP-y vs. APP-a:  $P = 0.099$ ; nTG-a vs. APP-a:  $P = 0.047$ ) between groups (recording session,  $n = 270$  for nTG-y;  $n = 302$  for nTG-a;  $n = 253$  for APP-y;  $n = 492$  for APP-a) for MEC recordings. **b** Mean % of the environment covered per minute (nTG-a vs. APP-a:  $P = 0.017$ ), and average running speed (nTG-a vs. APP-a:  $P = 1.4 \times 10^{-4}$ ) between groups (recording session,  $n = 91$  for nTG-a;  $n = 96$  for APP-a) for CA1 recordings. nTG-y, non-transgenic young; nTG-a, non-transgenic adult; APP-y, APP young; APP-a, APP adult. Wilcoxon rank sum tests (two-sided) corrected for multiple comparisons using a Bonferroni-Holm correction were applied to analyze the data in Supplementary Fig. 14 **a-b**. Data in bar graphs are presented as median values  $\pm 25^{\text{th}}$  and  $75^{\text{th}}$  percentiles; \* $P < 0.05$ , \*\* $P < 0.01$ , \*\*\* $P < 0.001$ ; n.s., not significant. Source data are provided as a Source Data file.

## Supplementary Figure 15

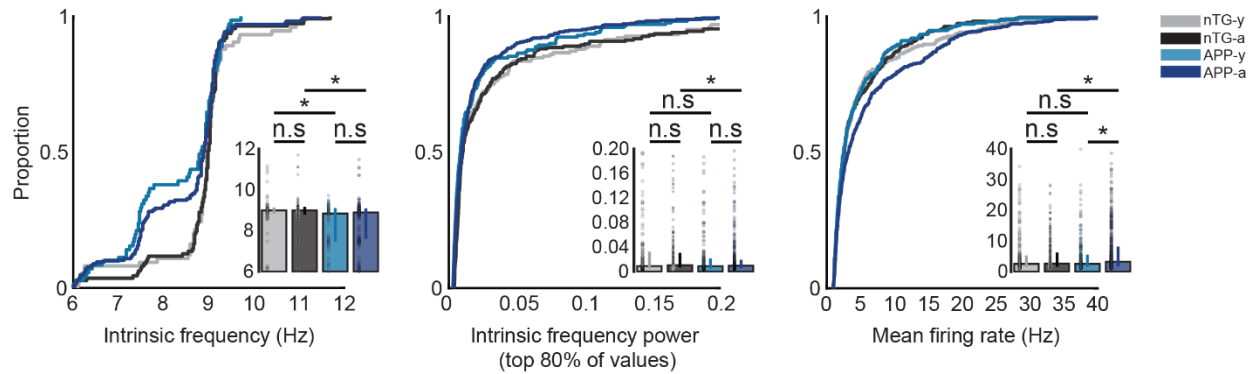

**Supplementary Figure 15. Interneuron firing properties.** Intrinsic frequency (nTG-y vs. nTG-a:  $P = 0.99$ ; nTG-y vs. APP-y:  $P = 0.038$ ; APP-y vs. APP-a:  $P = 0.49$ ; nTG-a vs. APP-a:  $P = 0.023$ ), intrinsic frequency power (for the top 80% of values) (nTG-y vs. nTG-a:  $P = 0.056$ ; nTG-y vs. APP-y:  $P = 0.58$ ; APP-y vs. APP-a:  $P = 0.38$ ; nTG-a vs. APP-a:  $P = 0.034$ ), and mean firing rate (nTG-y vs. nTG-a:  $P = 0.95$ ; nTG-y vs. APP-y:  $P = 0.82$ ; APP-y vs. APP-a:  $P = 0.034$ ; nTG-a vs. APP-a:  $P = 0.028$ ) of interneurons between groups (cells, intrinsic frequency:  $n = 74$  for nTG-y;  $n = 111$  for nTG-a;  $n = 71$  for APP-y;  $n = 167$  for APP-a; intrinsic frequency power:  $n = 164$  for nTG-y;  $n = 218$  for nTG-a;  $n = 170$  for APP-y;  $n = 350$  for APP-a; mean firing rate:  $n = 205$  for nTG-y;  $n = 272$  for nTG-a;  $n = 213$  for APP-y;  $n = 437$  for APP-a). nTG-y, non-transgenic young; nTG-a, non-transgenic adult; APP-y, APP young; APP-a, APP adult. Wilcoxon rank sum tests (two-sided) corrected for multiple comparisons using a Bonferroni-Holm correction were applied to analyze the data in Supplementary Fig. 15. Data in bar graphs are presented as median values  $\pm 25^{\text{th}}$  and  $75^{\text{th}}$  percentiles;  $*P < 0.05$ ; n.s., not significant. Source data are provided as a Source Data file.

## Supplementary Figure 16

Two-way ANOVA: Intrinsic frequency (Hz)

| Source      | Sum Square | df  | MS    | F     | p           |
|-------------|------------|-----|-------|-------|-------------|
| Age         | 0.58       | 1   | 0.58  | 0.60  | = 0.44      |
| Genotype    | 20.42      | 1   | 20.42 | 21.23 | = 0.0000054 |
| Interaction | 0.61       | 1   | 0.61  | 0.63  | = 0.43      |
| Error       | 403.04     | 419 | 0.96  |       |             |
| Total       | 423.90     | 422 |       |       |             |

Two-way ANOVA: Intrinsic frequency power (top 80% of values)

| Source      | Sum Square            | df  | MS                    | F     | p        |
|-------------|-----------------------|-----|-----------------------|-------|----------|
| Age         | $9 \times 10^{-5}$    | 1   | $9 \times 10^{-5}$    | 0.03  | = 0.85   |
| Genotype    | $3.74 \times 10^{-2}$ | 1   | $3.74 \times 10^{-2}$ | 14.72 | = 0.0001 |
| Interaction | $5.80 \times 10^{-4}$ | 1   | $5.80 \times 10^{-4}$ | 0.23  | = 0.63   |
| Error       | 2.28                  | 897 | $2.54 \times 10^{-3}$ |       |          |
| Total       | 2.33                  | 900 |                       |       |          |

Two-way ANOVA: Mean firing rate (Hz)

| Source      | Sum Square         | df   | MS     | F    | p        |
|-------------|--------------------|------|--------|------|----------|
| Age         | 147.70             | 1    | 147.70 | 3.06 | = 0.081  |
| Genotype    | 63.60              | 1    | 63.60  | 1.32 | = 0.25   |
| Interaction | 326.10             | 1    | 326.10 | 6.75 | = 0.0095 |
| Error       | $5.42 \times 10^4$ | 1123 | 48.34  |      |          |
| Total       | $5.50 \times 10^4$ | 1126 |        |      |          |

**Supplementary Figure 16. Slower intrinsic theta rhythmicity and reduced theta power in APP mice.** Two-way unbalanced ANOVAs compare the effects of age, genotype, and interaction on the intrinsic frequency, intrinsic frequency power (for the top 80% of values), and mean firing rates of interneurons between groups.

df = degrees of freedom, MS = mean square.

## Supplementary Figure 17

Two-way ANOVA: Grid cell-interneuron synchrony

| Source      | Sum Square | df  | MS     | F    | p          |
|-------------|------------|-----|--------|------|------------|
| Age         | 2.38       | 1   | 2.38   | 0.27 | = 0.60     |
| Genotype    | 173.58     | 1   | 173.58 | 19.8 | = 0.000013 |
| Interaction | 25.16      | 1   | 25.17  | 2.87 | = 0.09     |
| Error       | 2270.69    | 259 | 8.77   |      |            |
| Total       | 2520.39    | 262 |        |      |            |

Two-way ANOVA: Grid cell-head direction cell synchrony

| Source      | Sum Square | df  | MS    | F    | p        |
|-------------|------------|-----|-------|------|----------|
| Age         | 37.53      | 1   | 37.53 | 7.07 | = 0.0083 |
| Genotype    | 34.11      | 1   | 34.11 | 6.43 | = 0.0119 |
| Interaction | 16.08      | 1   | 16.08 | 3.03 | = 0.08   |
| Error       | 1289.16    | 243 | 5.31  |      |          |
| Total       | 1356.97    | 246 |       |      |          |

**Supplementary Figure 17. Grid cell synchrony with interneurons and head-direction cells are both impaired in APP mice.** Two-way unbalanced ANOVAs compare the effects of age, genotype, and interaction on the mean co-activity within a 25 ms time window for grid cell-interneuron pairs, and grid cell-head direction cell pairs.

df = degrees of freedom, MS = mean square.

## Supplementary Figure 18

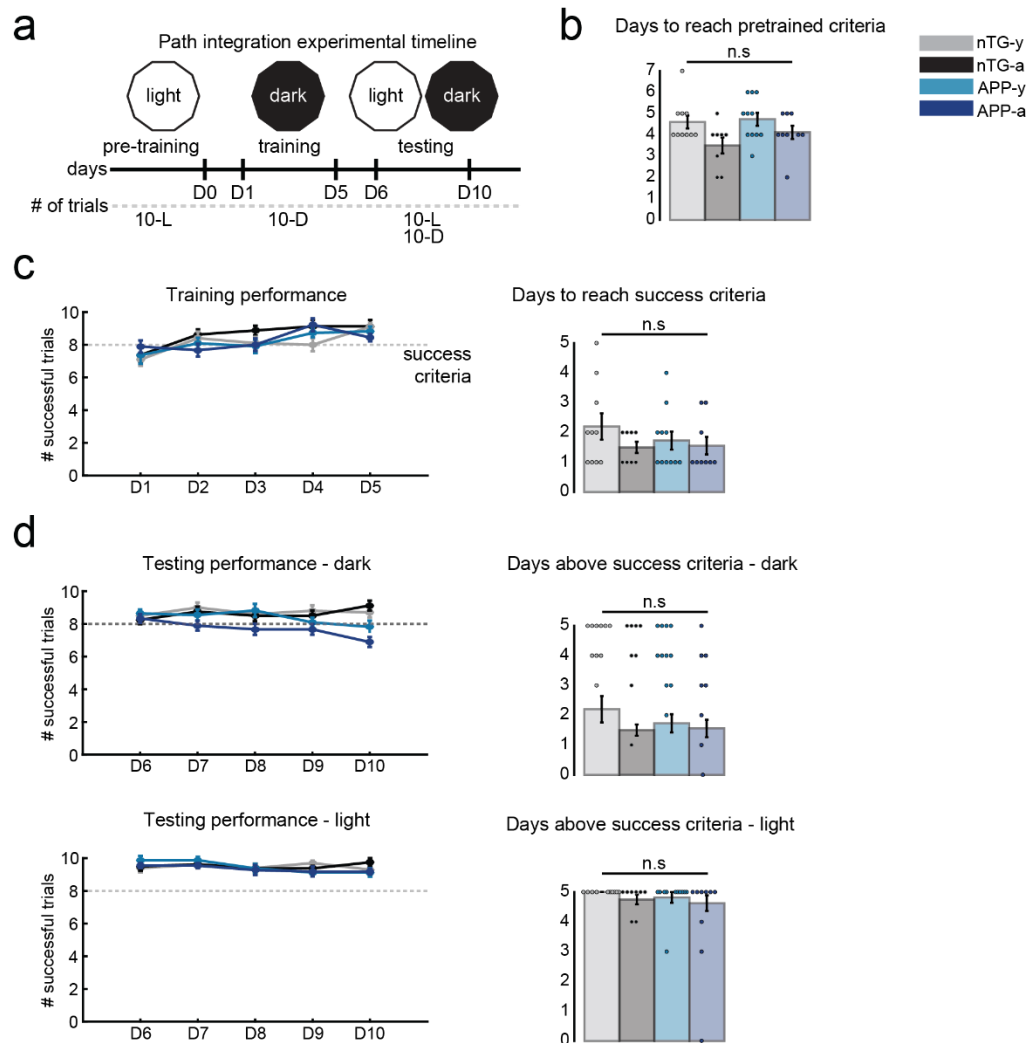

**Supplementary Figure 18. Experimental timeline for the path integration task and mouse performance across days.** **a** Experimental timeline for the food-foraging task. Days are indicated as D0, D1, etc. The number of trials that each mouse performed are indicated as 10-L (i.e., 10 light trials) and 10-D (i.e., 10 dark trials). **b** The number of days that it took mice in each group to achieve the success criteria in the pre-training phase (8/10 successful trials) (nTG-y-nTG-a:  $P = 0.079$ ; nTG-y-APP-y:  $P = 0.65$ ; APP-y-APP-a:  $P = 0.24$ ; nTG-a-APP-a:  $P = 0.28$ ) between groups (mice,  $n = 10$  for nTG-y;  $n = 8$  for nTG-a;  $n = 11$  for APP-y;  $n = 9$  for APP-a). **c** (Left) The number of successful trials achieved by mice across 5 days of training. (Right) The number of days within this training period that mice took to reach the success criteria (nTG-y-nTG-a:  $P = 0.42$ ; nTG-y-APP-y:  $P = 0.45$ ; APP-y-APP-a:  $P = 0.70$ ; nTG-a-APP-a:  $P = 0.84$ ) across groups (same sample

sizes as in **a**). **d** (Top-Left) Same as (**c**) but across 5 days of testing in dark conditions. (Top-Right) The number of days within this testing period that mice performed at or above the success criteria (nTG-y-nTG-a:  $P = 0.60$ ; nTG-y-APP-y:  $P = 0.24$ ; APP-y-APP-a:  $P = 0.11$ ; nTG-a-APP-a:  $P = 0.11$ ) across groups (same sample sizes as in **a**). (Bottom-Left) Same as (**c**) but across 5 days of testing in light conditions. (Bottom-Right) The number of days within this testing period that mice performed at or above the success criteria (nTG-y-nTG-a:  $P = 0.37$ ; nTG-y-APP-y:  $P = 0.39$ ; APP-y-APP-a:  $P = 0.21$ ; nTG-a-APP-a:  $P = 0.59$ ) between groups (same sample sizes as in **a**). nTG-y, non-transgenic young; nTG-a, non-transgenic adult; APP-y, APP young; APP-a, APP adult. Wilcoxon rank sum tests (two-sided) corrected for multiple comparisons using a Bonferroni-Holm correction were applied to analyze the data in Supplementary Fig. 18 **b-d**. Data in line graphs are presented as mean values  $\pm$  SEM. Data in bar graphs are presented as mean values  $\pm$  SEM; n.s, not significant. Source data are provided as a Source Data file.

## Supplementary Figure 19

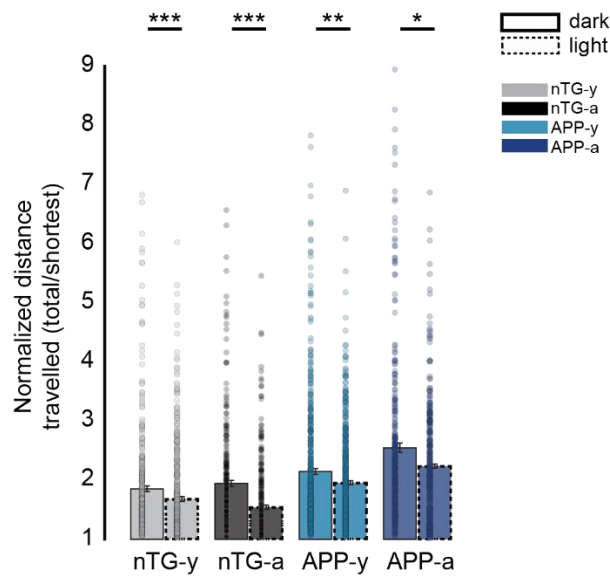

### Supplementary Figure 19. Overall navigation ability improves in light trials for all mice.

Normalized distance travelled in dark (solid lines) versus light (dashed lines) trials. (nTG-y:  $P = 6.9 \times 10^{-9}$ ; nTG-a:  $P = 1.4 \times 10^{-21}$ ; APP-y:  $P = 0.0084$ ; APP-a:  $P = 0.017$ ) (dark behavior trials,  $n = 377$  for nTG-y;  $n = 307$  for nTG-a;  $n = 500$  for APP-y;  $n = 311$  for APP-a; light behavior trials,  $n = 426$  for nTG-y;  $n = 344$  for nTG-a;  $n = 538$  for APP-y;  $n = 330$  for APP-a). nTG-y, non-transgenic young; nTG-a, non-transgenic adult; APP-y, APP young; APP-a, APP adult. Wilcoxon rank sum tests (two-sided) were applied to analyze the data in Supplementary Fig. 19. Data are presented as mean values  $\pm$  SEM; \* $P < 0.05$ , \*\* $P < 0.01$ , \*\*\* $P < 0.001$ ; Source data are provided as a Source Data file.



## Supplementary Figure 20

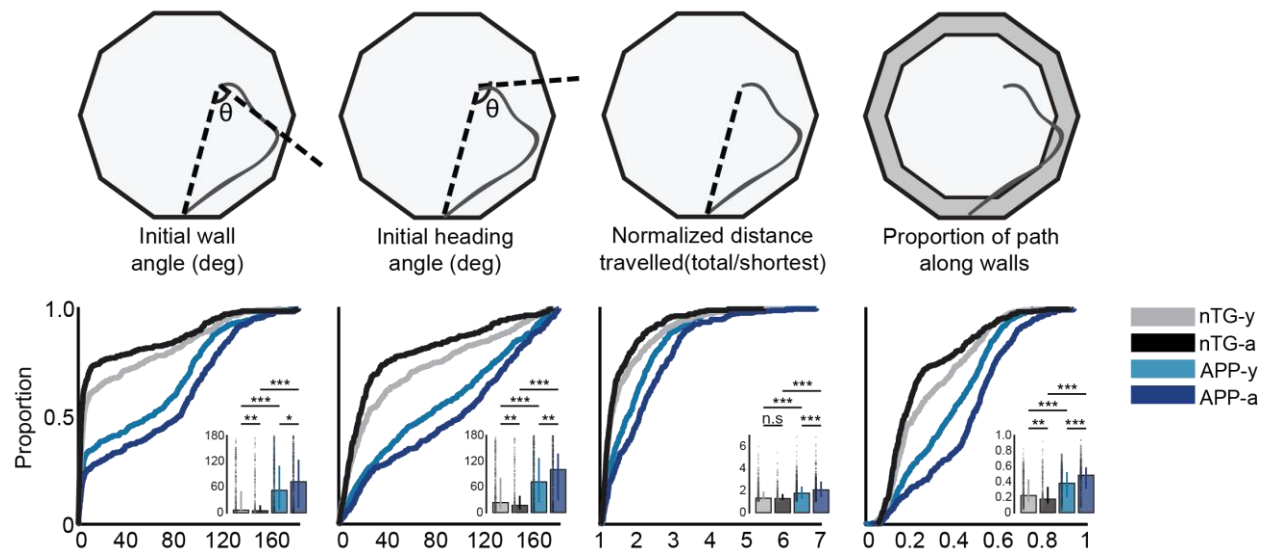

**Supplementary Figure 20. APP mice have impaired path integration ability in light conditions.** The initial wall angle (nTG-y vs. nTG-a:  $P = 0.0075$ ; nTG-y vs. APP-y:  $P = 1.1 \times 10^{-18}$ ; APP-y vs. APP-a:  $P = 0.013$ ; nTG-a vs. APP-a:  $P = 1.5 \times 10^{-32}$ ), the initial heading angle (nTG-y vs. nTG-a:  $P = 0.0029$ ; nTG-y vs. APP-y:  $P = 3.4 \times 10^{-17}$ ; APP-y vs. APP-a:  $P = 0.0044$ ; nTG-a vs. APP-a:  $P = 1.2 \times 10^{-33}$ ), the normalized distance travelled (nTG-y vs. nTG-a:  $P = 0.053$ ; nTG-y vs. APP-y:  $P = 7.7 \times 10^{-12}$ ; APP-y vs. APP-a:  $P = 6.3 \times 10^{-5}$ ; nTG-a vs. APP-a:  $P = 1.2 \times 10^{-26}$ ), and the proportion of the return path spent along the periphery (nTG-y vs. nTG-a:  $P = 0.0015$ ; nTG-y vs. APP-y:  $P = 8.2 \times 10^{-13}$ ; APP-y vs. APP-a:  $P = 9.5 \times 10^{-9}$ ; nTG-a vs. APP-a:  $P = 9.3 \times 10^{-35}$ ) between groups (behavior trials,  $n = 426$  for nTG-y;  $n = 344$  for nTG-a;  $n = 538$  for APP-y;  $n = 330$  for APP-a). nTG-y, non-transgenic young; nTG-a, non-transgenic adult; APP-y, APP young; APP-a, APP adult. Wilcoxon rank sum tests (two-sided) corrected for multiple comparisons using a Bonferroni-Holm correction were applied to analyze the data in Supplementary Fig. 20. Data in bar graphs are presented as median values  $\pm$  25<sup>th</sup> and 75<sup>th</sup> percentiles; \* $P < 0.05$ , \*\* $P < 0.01$ , \*\*\* $P < 0.001$ ; n.s., not significant. Source data are provided as a Source Data file.

## Supplementary Figure 21

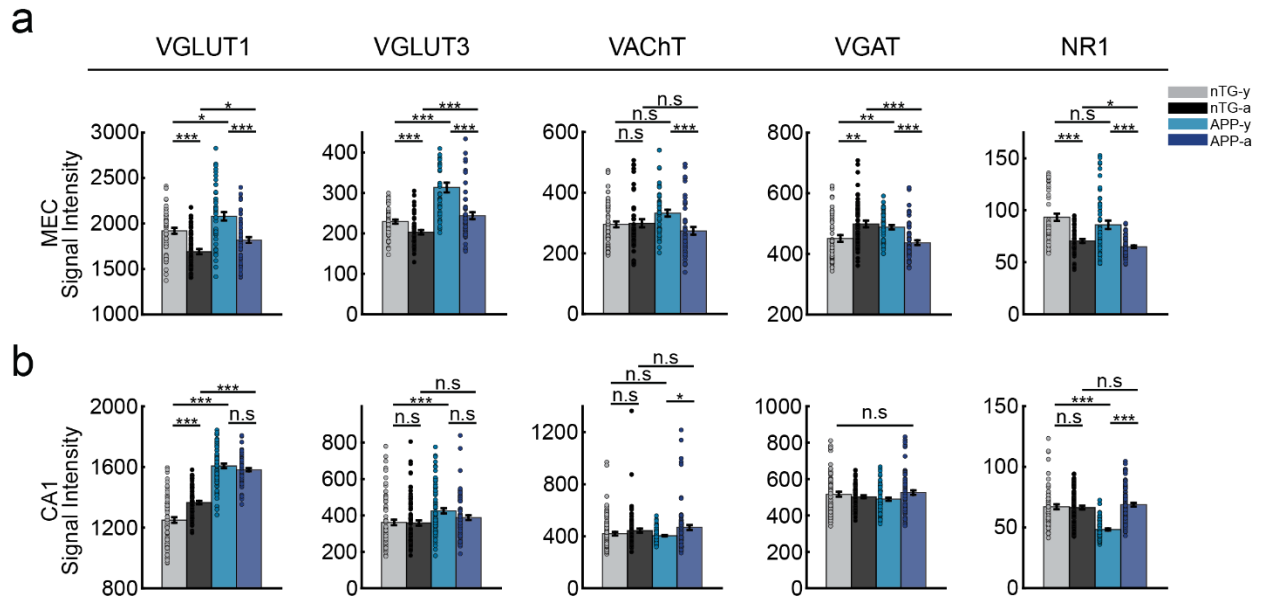

**Supplementary Figure 21. Immunohistochemical labelling of synaptic markers in MEC and CA1. a** Signal intensity of VGLUT1 (nTG-y-nTG-a:  $P = 1.3 \times 10^{-5}$ ; nTG-y-APP-y:  $P = 0.014$ ; APP-y-APP-a:  $P = 1.1 \times 10^{-4}$ ; nTG-a-APP-a:  $P = 0.014$ ;  $n = 52$  nTG-y; 53 nTG-a; 48 APP-y; 55 APP-a), VGLUT3 (nTG-y-nTG-a:  $P = 1.9 \times 10^{-4}$ ; nTG-y-APP-y:  $P = 1.5 \times 10^{-8}$ ; APP-y-APP-a:  $P = 2.6 \times 10^{-6}$ ; nTG-a-APP-a:  $P = 2.3 \times 10^{-4}$ ;  $n = 52$  nTG-y; 50 nTG-a; 45 APP-y; 51 APP-a), VACHT (nTG-y-nTG-a:  $P = 0.87$ ; nTG-y-APP-y:  $P = 0.053$ ; APP-y-APP-a:  $P = 4.5 \times 10^{-4}$ ; nTG-a-APP-a:  $P = 0.051$ ;  $n = 47$  nTG-y; 45 nTG-a; 48 APP-y; 52 APP-a), VGAT (nTG-y-nTG-a:  $P = 0.0037$ ; nTG-y-APP-y:  $P = 0.0027$ ; APP-y-APP-a:  $P = 7.4 \times 10^{-6}$ ; nTG-a-APP-a:  $P = 2.1 \times 10^{-5}$ ;  $n = 49$  nTG-y; 50 nTG-a; 46 APP-y; 55 APP-a) and NR1 (nTG-y-nTG-a:  $P = 1.6 \times 10^{-5}$ ; nTG-y-APP-y:  $P = 0.063$ ; APP-y-APP-a:  $P = 2.7 \times 10^{-5}$ ; nTG-a-APP-a:  $P = 0.023$ ;  $n = 48$  nTG-y; 53 nTG-a; 51 APP-y; 58 APP-a) in the MEC. **b** Signal intensity of VGLUT1 (nTG-y-nTG-a:  $P = 4.6 \times 10^{-6}$ ; nTG-y-APP-y:  $P = 3.9 \times 10^{-21}$ ; APP-y-APP-a:  $P = 0.15$ ; nTG-a-APP-a:  $P = 4.5 \times 10^{-21}$ ;  $n = 79$  nTG-y; 80 nTG-a; 70 APP-y; 79 APP-a), VGLUT3 (nTG-y-nTG-a:  $P = 0.76$ ; nTG-y-APP-y:  $P = 5.7 \times 10^{-4}$ ; APP-y-APP-a:  $P = 0.066$ ; nTG-a-APP-a:  $P = 0.10$ ;  $n = 76$  nTG-y; 84 nTG-a; 81 APP-y; 77 APP-a), VACHT (nTG-y-nTG-a:  $P = 0.14$ ; nTG-y-APP-y:  $P = 0.30$ ; APP-y-APP-a:  $P = 0.039$ ; nTG-a-APP-a:  $P = 0.39$ ;  $n = 86$  nTG-y; 78 nTG-a; 82 APP-y; 87 APP-a) VGAT (nTG-y-nTG-a:  $P = 0.87$ ; nTG-y-APP-y:  $P = 0.33$ ; APP-y-APP-a:  $P = 0.074$ ; nTG-a-APP-a:  $P = 0.35$ ;  $n = 72$  nTG-y; 69 nTG-a; 70 APP-y; 79 APP-a) and NR1 (NR1: nTG-y-nTG-a:  $P = 0.71$ ; nTG-y-APP-y:  $P =$

$2.1 \times 10^{-14}$ ; APP-y-APP-a:  $P = 9.4 \times 10^{-19}$ ; nTG-a-APP-a:  $P = 0.41$ ;  $n = 70$  nTG-y; 82 nTG-a; 72 APP-y; 85 APP-a) in CA1. Wilcoxon rank sum tests (two-sided) corrected for multiple comparisons using Bonferroni-Holm's correction were applied to Supplementary Fig. 21 **a-b**. Data are presented as mean values  $\pm$  SEM; \* $P < 0.05$ , \*\* $P < 0.01$ , \*\*\* $P < 0.001$ ; n.s, not significant. Source data are provided as a Source Data file.

# Supplementary Figure 22

a

## Linear mixed effects model predicting VGLUT3 expression in the MEC

### Model information

Number of observations : 198  
 Fixed effects coefficients : 3  
 Random effects coefficients : 48  
 Covariance parameters : 4

### Model fit statistics

AIC : 2071.4  
 BIC : 2094.4  
 Log Likelihood : -1028.7  
 Deviance : 2057.4

### Fixed effects coefficients (95% CIs):

| Name      | Estimate | Std. Error | tStat | DF  | p         | 95% CI  |        |
|-----------|----------|------------|-------|-----|-----------|---------|--------|
|           |          |            |       |     |           | LL      | UL     |
| Intercept | 253.03   | 18.12      | 13.96 | 195 | = 3.6e-31 | 217.29  | 288.77 |
| Genotype  | -60.5    | 21.78      | -2.78 | 195 | = 0.006   | -103.45 | -17.55 |
| Age       | 48.23    | 21.96      | 2.2   | 195 | = 0.0292  | 4.93    | 91.55  |

### Random effects covariance (95% CIs):

| Subject(16 levels) | Estimate | 95% CI |       |
|--------------------|----------|--------|-------|
|                    |          | LL     | UL    |
| Intercept          | 39.48    | 25.95  | 60.05 |
| * Genotype         | < 0.001  | NaN    | NaN   |
| * Age              | 22.15    | 19.98  | 24.56 |

  

| Error    | Estimate | 95% CI |       |
|----------|----------|--------|-------|
|          |          | LL     | UL    |
| Residual | 39.1     | 35.29  | 43.33 |

b

## Linear mixed effects model predicting VGLUT1 expression in CA1

### Model information

Number of observations : 308  
 Fixed effects coefficients : 3  
 Random effects coefficients : 48  
 Covariance parameters : 4

### Model fit statistics

AIC : 3687.8  
 BIC : 3713  
 Log Likelihood : -1836.9  
 Deviance : 3673.8

### Fixed effects coefficients (95% CIs):

| Name      | Estimate | Std. Error | tStat | DF  | p          | 95% CI  |        |
|-----------|----------|------------|-------|-----|------------|---------|--------|
|           |          |            |       |     |            | LL      | UL     |
| Intercept | 1590.7   | 21.47      | 74.09 | 305 | = 4.8e-197 | 1548.5  | 1633   |
| Genotype  | -270.68  | 45.09      | -6    | 305 | = 5.5e-9   | -359.41 | -181.9 |
| Age       | -3.91    | 38.68      | -0.1  | 305 | = 0.92     | -80.02  | 72.2   |

### Random effects covariance (95% CIs):

| Subject(16 levels) | Estimate | 95% CI |        |
|--------------------|----------|--------|--------|
|                    |          | LL     | UL     |
| Intercept          | 39.6     | 17.22  | 91.03  |
| * Genotype         | 96.99    | 30.2   | 311.5  |
| * Age              | 61.3     | 9.05   | 415.14 |

  

| Error    | Estimate | 95% CI |       |
|----------|----------|--------|-------|
|          |          | LL     | UL    |
| Residual | 84.54    | 80.72  | 94.93 |

Supplementary Figure 22. We used the fitlme function in MATLAB to perform linear mixed effects analyses on the relationship between the subjects' genotype (nTG and APP), age

**(young and adult) and expression of VGLUT3 and VGLUT1 levels in the MEC and CA1 respectively.** The fixed effects of the model comprised genotype and age (without interaction between the two). The random effects of the model comprised random intercepts by-subject, random slopes for the effects of genotype and age by-subject, and independence between the intercepts and slopes. P-values obtained in the model output were considered as the measurements for significance.

**a** Table shows the model information, statistics of fit, the fixed effects coefficients, and the random effects covariance parameters. In the fixed effects panel, the ‘Intercept’ refers to the aged APP experimental group; its estimate is the predicted mean VGLUT3 signal intensity. The estimates for genotype and age refer to the predicted slope change from the intercept. Std. Error refers to the standard error associated with the slope. T-values and P-values for the contribution of genotype and age are bolded. **b** Same as **(a)** but for levels of VGLUT1 in CA1.

tStat = T-value, CI = confidence interval, DF = degrees of freedom, LL = lower limit, UL = upper limit.

\* = independence between intercepts and slopes.

## Supplementary Figure 23

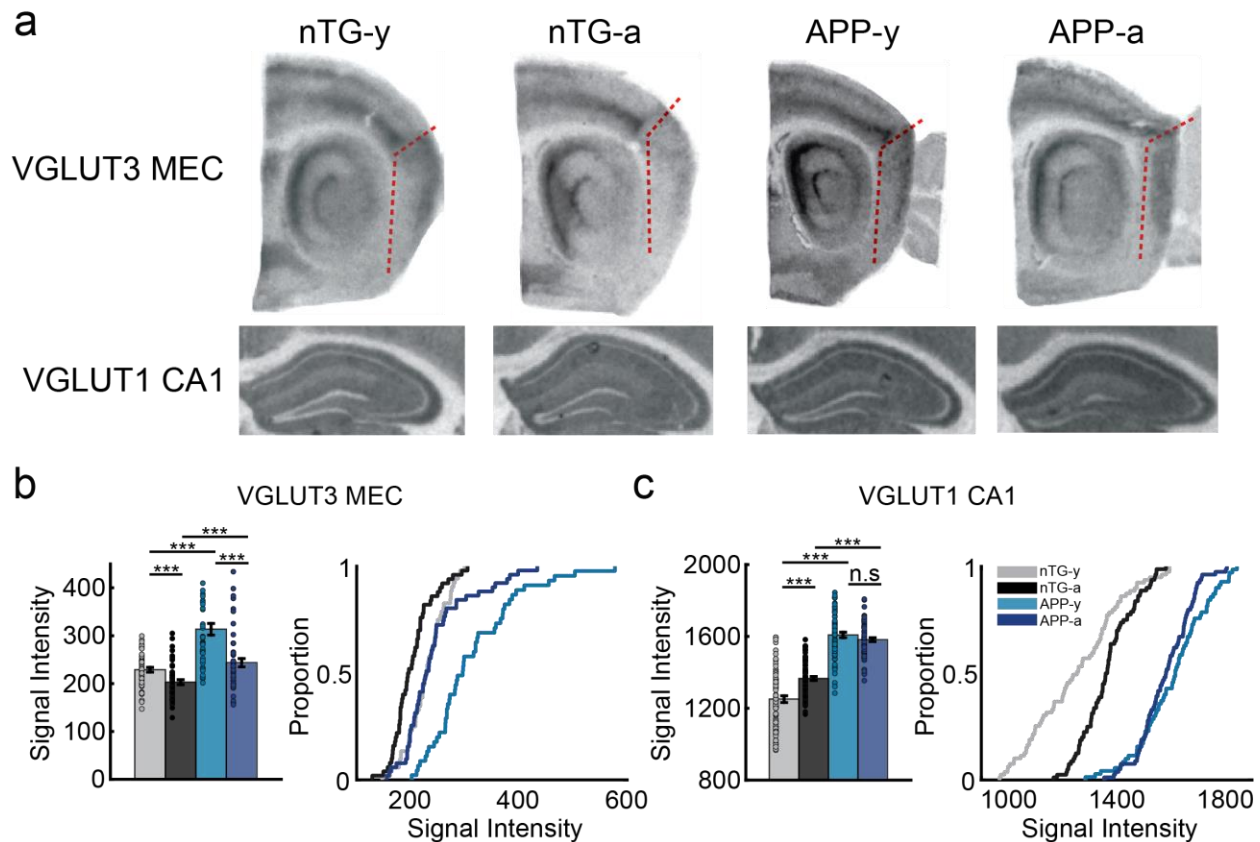

**Supplementary Figure 23. Pathological expression of MEC VGLUT3 levels and CA1 VGLUT1 levels in APP mice.** **a** Single slice examples of VGLUT3 and VGLUT1 expression in MEC and CA1 respectively. Darker signals indicate higher marker expression levels. **b** Signal intensity of VGLUT3 levels (nTG-y vs. nTG-a:  $P = 1.9 \times 10^{-4}$ ; nTG-y vs. APP-y:  $P = 1.5 \times 10^{-8}$ ; APP-y vs. APP-a:  $P = 2.6 \times 10^{-6}$ ; nTG-a vs. APP-a:  $P = 2.3 \times 10^{-4}$ ) in the MEC between groups (brain slice,  $n = 52$  for nTG-y;  $n = 50$  for nTG-a;  $n = 45$  for APP-y;  $n = 51$  for APP-a). **c** Signal intensity of VGLUT1 levels (nTG-y vs. nTG-a:  $P = 4.6 \times 10^{-6}$ ; nTG-y vs. APP-y:  $P = 3.9 \times 10^{-21}$ ; APP-y vs. APP-a:  $P = 0.15$ ; nTG-a vs. APP-a:  $P = 4.5 \times 10^{-21}$ ) in CA1 between groups (brain slice,  $n = 79$  for nTG-y;  $n = 80$  for nTG-a;  $n = 70$  for APP-y;  $n = 79$  for APP-a). nTG-y, non-transgenic young; nTG-a, non-transgenic adult; APP-y, APP young; APP-a, APP adult. Wilcoxon rank sum tests (two-sided) corrected for multiple comparisons using a Bonferroni-Holm correction were applied to analyze the data in Supplementary Fig. 23 **b-c**. Data in bar graphs are presented as mean values  $\pm$  SEM; \* $P < 0.05$ , \*\* $P < 0.01$ , \*\*\* $P < 0.001$ ; n.s, not significant. Source data are provided as a Source Data file.

## Supplementary Figure 24

Two-way ANOVA: VGLUT3 signal in the MEC

| Source      | Sum Square (10 <sup>4</sup> ) | df  | MS(10 <sup>4</sup> ) | F     | p         |
|-------------|-------------------------------|-----|----------------------|-------|-----------|
| Age         | 11.34                         | 1   | 11.34                | 35.83 | = 1e-8    |
| Genotype    | 19.34                         | 1   | 19.34                | 61.09 | = 3.4e-13 |
| Interaction | 2.36                          | 1   | 2.36                 | 7.46  | = 0.0069  |
| Error       | 61.42                         | 194 | 0.32                 |       |           |
| Total       | 92.71                         | 197 |                      |       |           |

Two-way ANOVA: VGLUT1 signal in CA1

| Source      | Sum Square (10 <sup>4</sup> ) | df  | MS(10 <sup>4</sup> ) | F      | p         |
|-------------|-------------------------------|-----|----------------------|--------|-----------|
| Age         | 15.28                         | 1   | 15.28                | 9.94   | = 0.0018  |
| Genotype    | 631.66                        | 1   | 631.66               | 410.95 | = 2.1e-58 |
| Interaction | 38.18                         | 1   | 38.18                | 24.84  | = 1e-6    |
| Error       | 467.27                        | 304 | 1.54                 |        |           |
| Total       | 1150.26                       | 307 |                      |        |           |

**Supplementary Figure 24. VGLUT3 levels in the MEC and VGLUT1 levels in the CA1 are both higher in APP mice.** Two-way unbalanced ANOVAs compare the effects of age, genotype, and interaction on VGLUT3 and VGLUT1 signal levels in the MEC and CA1 respectively.

df = degrees of freedom, MS = mean square.
